# Supplementary material for: Triplet-Energy Quenching Functions of Antioxidant Molecules
Source: Antioxidants (Basel). 2022 Feb 11;11(2):357. doi: 10.3390/antiox11020357 (PMC8868474; doi:10.3390/antiox11020357)
Supplement: Supplementary file 1 [file antioxidants-11-00357-s001.zip › antioxidants-1520830-supplementary data.pdf]

## SUPPLEMENTARY DATA

### Triplet-Energy Quenching Functions of Antioxidant Biomolecules

Carlos Angelé-Martínez, Leticia C. P. Goncalves, Sanjay Premi, Felipe A. Augusto, Meg A. Palmatier,  
Saroj K. Amar, and Douglas E. Brash

#### TABLE OF CONTENTS

|                                                                                                                     |    |
|---------------------------------------------------------------------------------------------------------------------|----|
| <b>Figure S1.</b> Chemiluminescence of TMD-DBAS excitation in the presence of <b>curcumin</b> .                     | 2  |
| <b>Figure S2.</b> Chemiluminescence of TMD-DBAS triplet excitation in the presence of <b>resveratrol</b> .          | 3  |
| <b>Figure S3.</b> Chemiluminescence of TMD-DBAS excitation in the presence of <b>potassium sorbate</b> .            | 4  |
| <b>Figure S4.</b> Chemiluminescence of TMD-DBAS triplet excitation in the presence of <b>ferulic acid</b> .         | 5  |
| <b>Figure S5.</b> Chemiluminescence of TMD-DBAS excitation in the presence of <b>baicalein</b> .                    | 6  |
| <b>Figure S6.</b> Chemiluminescence of TMD-DBAS excitation in the presence of <b>polydatin</b> .                    | 7  |
| <b>Figure S7.</b> Chemiluminescence of TMD-DBAS excitation in the presence of <b>glutathione</b> .                  | 8  |
| <b>Figure S8.</b> Chemiluminescence of TMD-DBAS excitation in the presence of <b>baicalin</b> .                     | 9  |
| <b>Figure S9.</b> Chemiluminescence of TMD-DBAS excitation in the presence of <b>caffeic acid</b> .                 | 10 |
| <b>Figure S10.</b> Chemiluminescence of TMD-DBAS excitation in the presence of <b>epicatechin</b> .                 | 11 |
| <b>Figure S11.</b> Chemiluminescence of TMD-DBAS excitation in the presence of <b>myricetin</b> .                   | 12 |
| <b>Figure S12.</b> Chemiluminescence from TMD-DBAS triplet excitation in the presence of <b>ellagic acid</b> .      | 13 |
| <b>Figure S13.</b> Chemiluminescence from TMD-DBAS triplet excitation in the presence of <b>Trolox</b> .            | 14 |
| <b>Figure S14.</b> Chemiluminescence from TMD-DBAS triplet excitation in the presence of <b>chlorogenic acid</b> .  | 15 |
| <b>Figure S15.</b> Chemiluminescence of TMD-DBAS excitation in the presence of <b>luteolin</b> .                    | 16 |
| <b>Figure S16.</b> Chemiluminescence of TMD-DBAS excitation in the presence of <b>epigallocatechin gallate</b> .    | 17 |
| <b>Figure S17.</b> Chemiluminescence of TMD-DBAS excitation in the presence of <b>gallic acid</b> .                 | 18 |
| <b>Figure S18.</b> Chemiluminescence of TMD-DBAS triplet excitation in the presence of <b>honeysuckle extract</b> . | 19 |
| <b>Figure S19.</b> Chemiluminescence of TMD-DBAS triplet excitation in the presence of <b>algae extracts</b> .      | 20 |
| <b>Figure S20.</b> dCPD quenching activity before and after correcting for ELISA assay nonlinearity                 | 22 |
| <b>Table S1.</b> Triplet-state quenching survey.                                                                    | 23 |
| <b>Table S2.</b> TMD-DBAS quenching activity of algal extracts.                                                     | 24 |

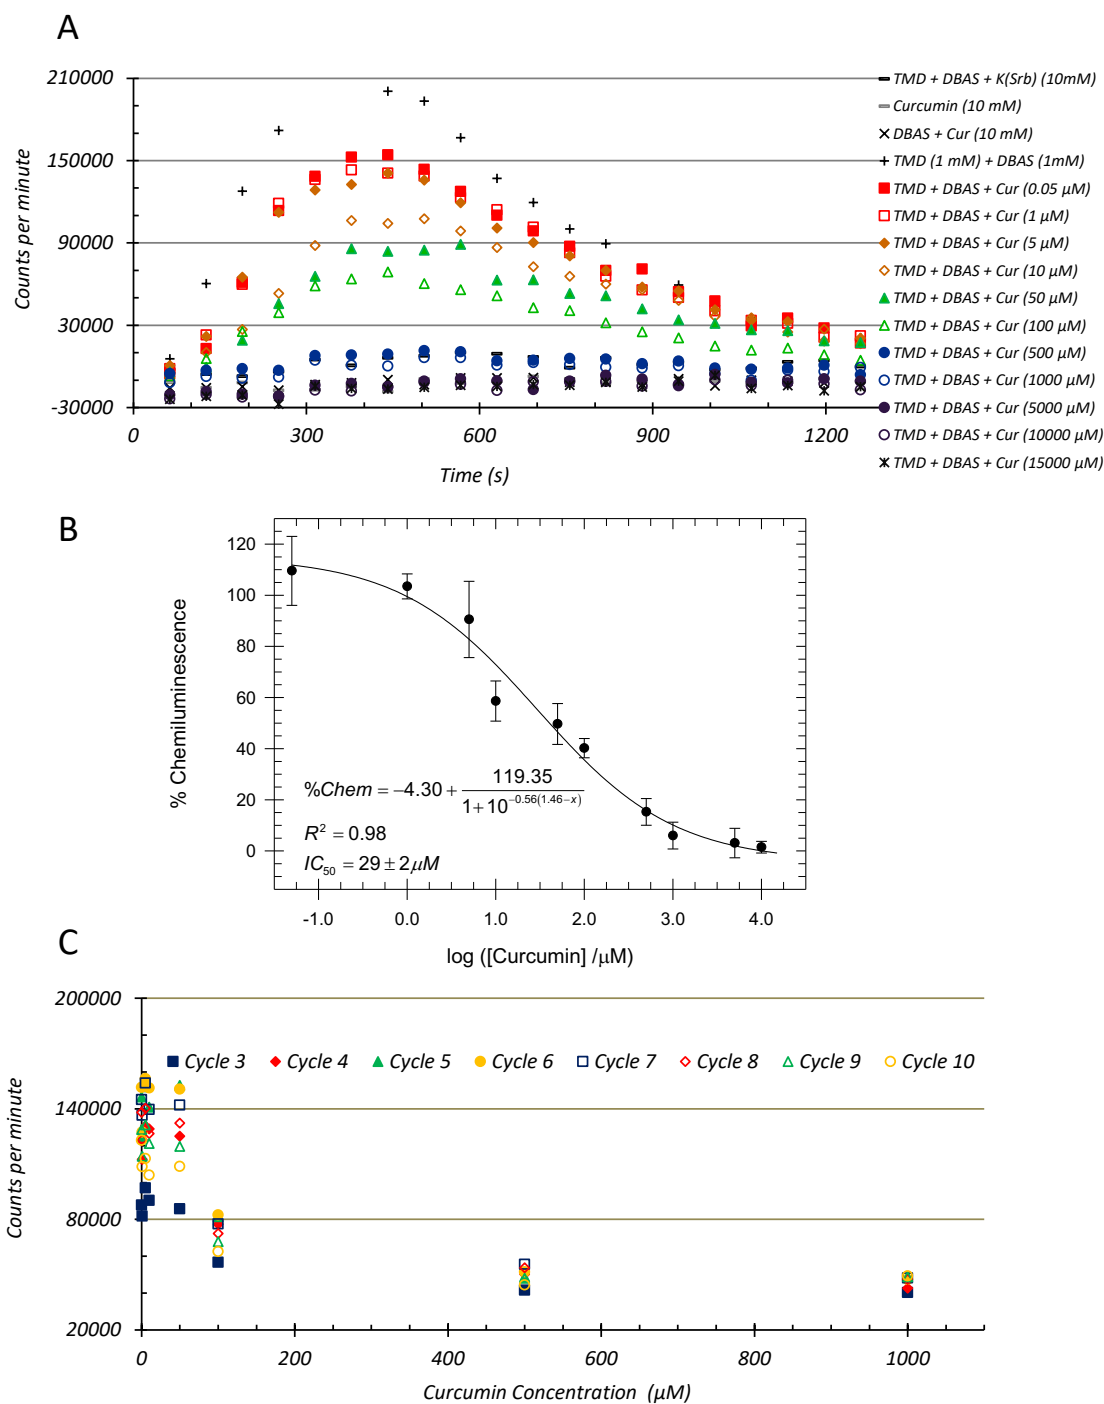

**Figure S1.** Chemiluminescence of TMD-DBAS excitation in the presence of **curcumin**.

**(A)** TMD-DBAS chemiluminescence with respect to time at different concentrations of curcumin.

**(B)**  $IC_{50}$  curve for the percentage reduction of chemiluminescence of TMD-DBAS excitation vs logarithm of concentration of curcumin.

**(C)** TMD-DBAS chemiluminescence with respect to concentration of curcumin at different cycles of measurement (1 cycle = 63 s).

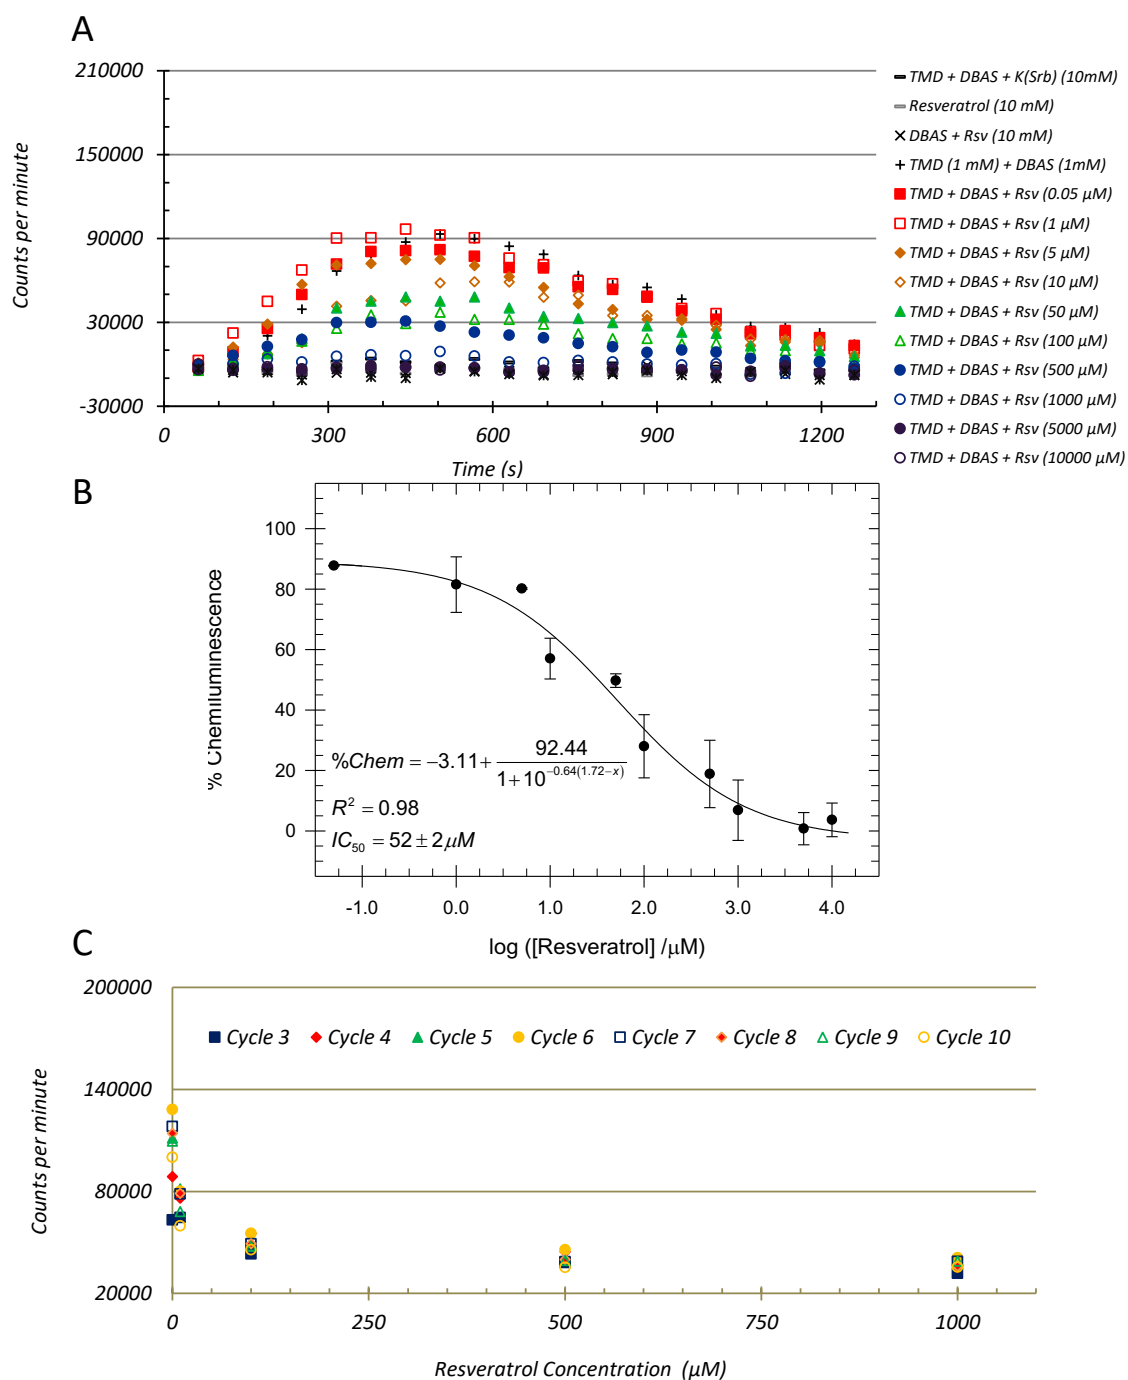

**Figure S2.** Chemiluminescence of TMD-DBAS triplet excitation in the presence of **resveratrol**.

**(A)** TMD-DBAS chemiluminescence with respect to time at different concentrations of resveratrol.

**(B)**  $IC_{50}$  curve for the percentage reduction of chemiluminescence of TMD-DBAS excitation vs logarithm of concentration of resveratrol.

**(C)** TMD-DBAS chemiluminescence with respect to concentration of resveratrol at different cycles of measurement (1 cycle = 63 s).

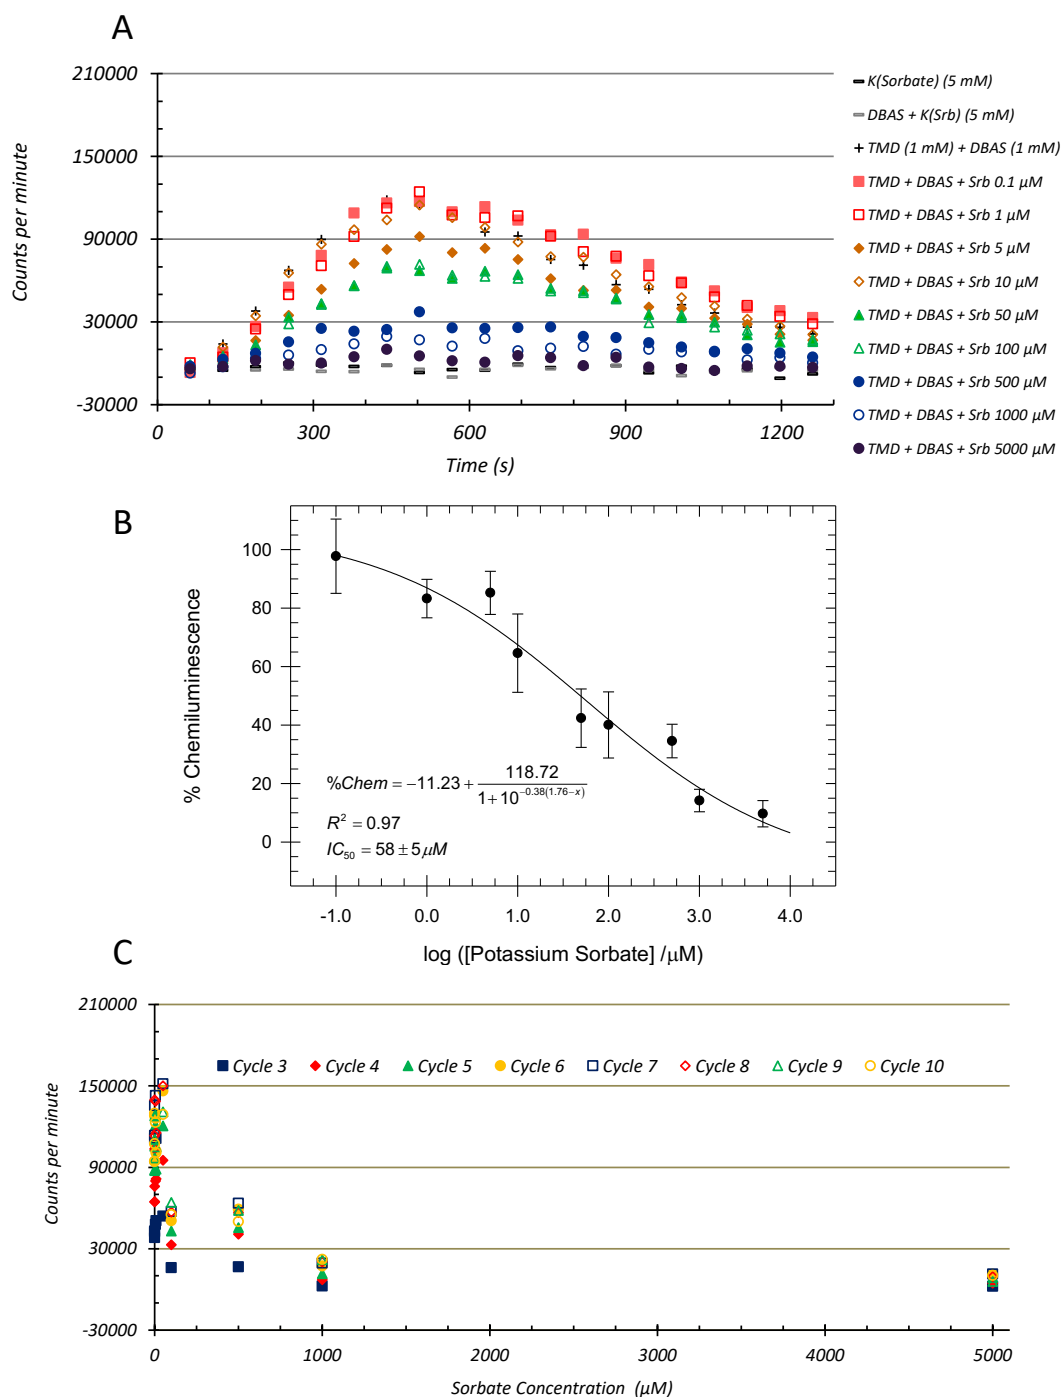

**Figure S3.** Chemiluminescence of TMD-DBAS excitation in the presence of **potassium sorbate**.

**(A)** TMD-DBAS chemiluminescence with respect to time at different concentrations of potassium sorbate (Srb).

**(B)**  $IC_{50}$  curve for the percentage of reduction of chemiluminescence of TMD-DBAS excitation vs logarithm of concentration potassium sorbate.

**(C)** TMD-DBAS chemiluminescence with respect to concentration of potassium sorbate at different cycles of measurement (1 cycle = 63 s).

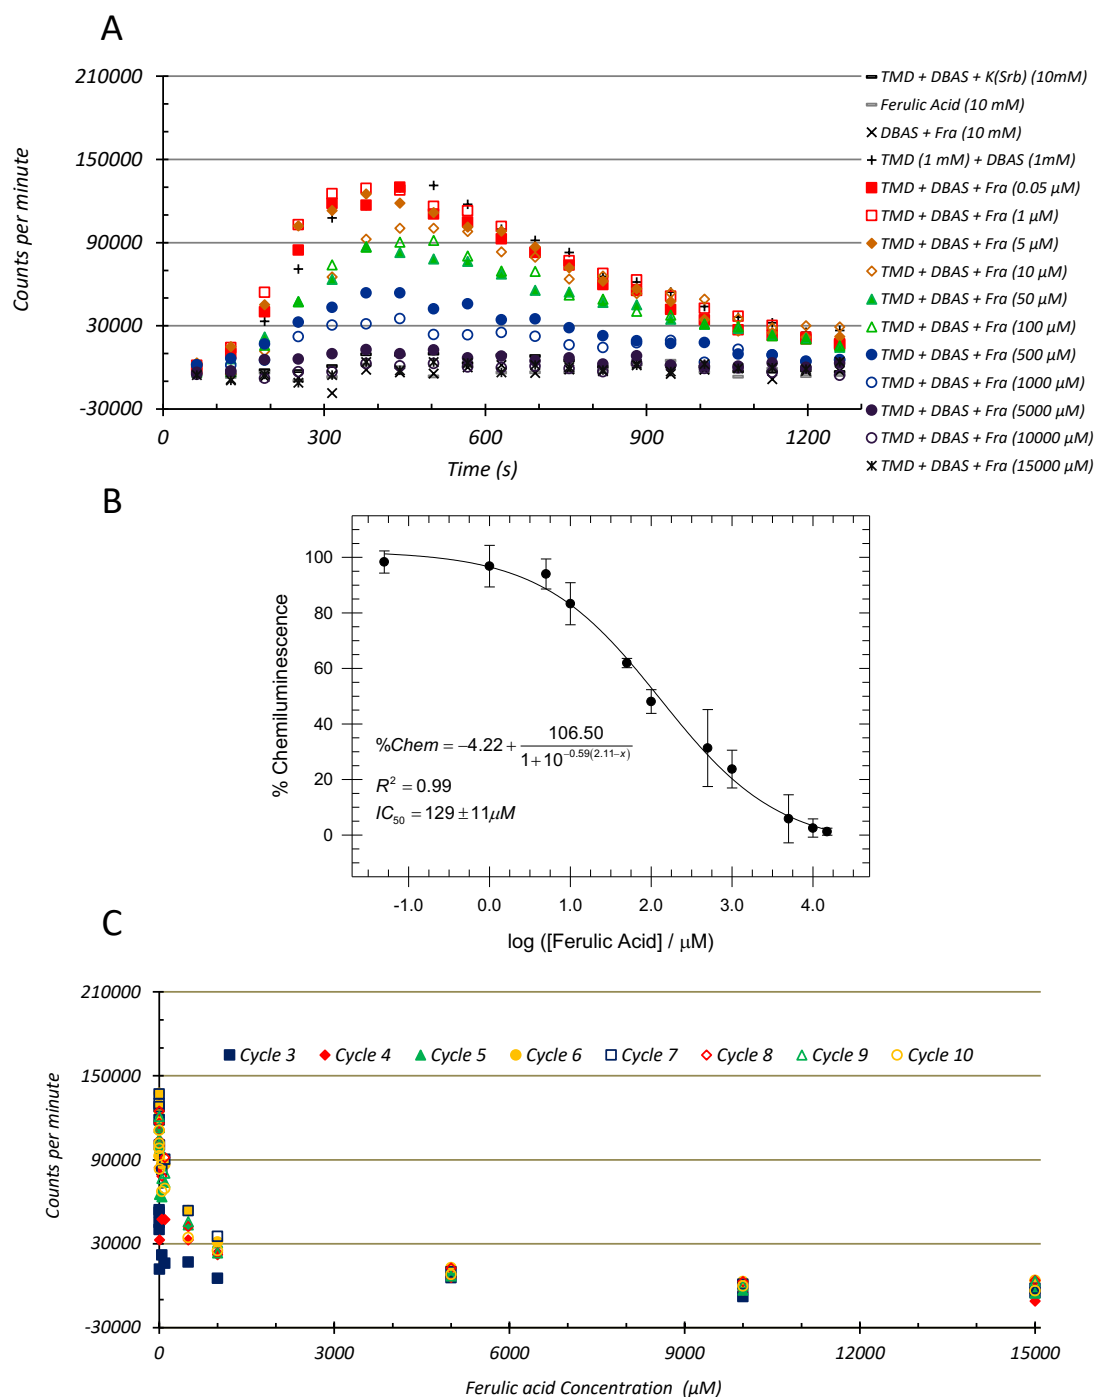

**Figure S4.** Chemiluminescence of TMD-DBAS triplet excitation in the presence of **ferulic acid**.

**(A)** TMD-DBAS chemiluminescence with respect to time at different concentrations of ferulic acid.

**(B)**  $IC_{50}$  curve for the percentage of reduction of chemiluminescence of TMD-DBAS excitation vs logarithm of concentration of ferulic acid.

**(C)** TMD-DBAS chemiluminescence with respect to concentration of ferulic acid at different cycles of measurement (1 cycle = 63 s).

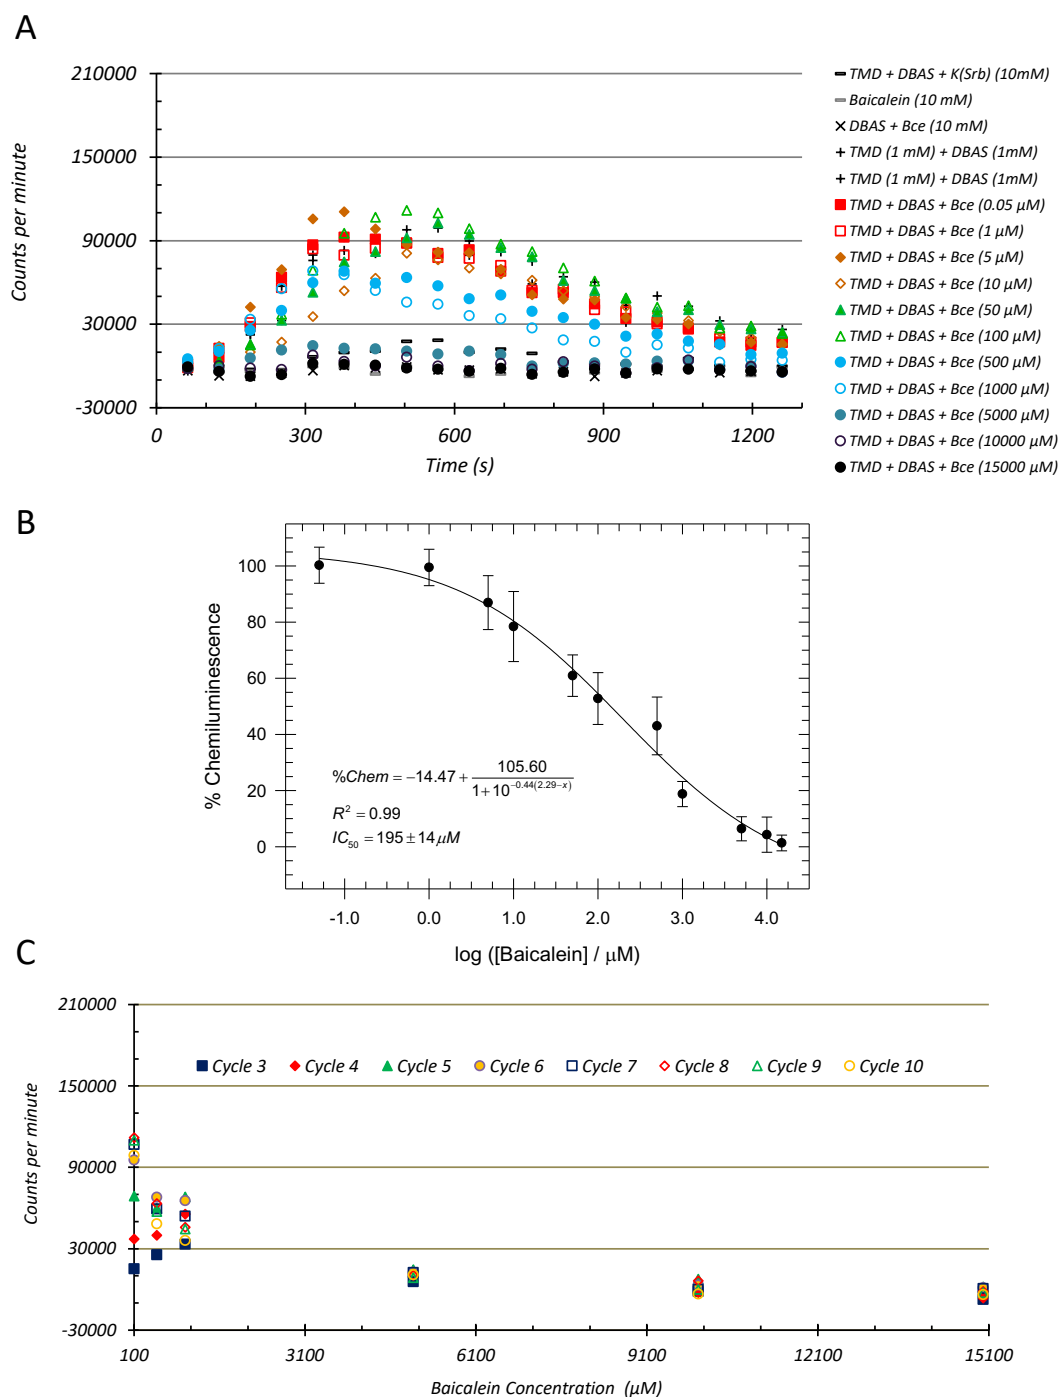

**Figure S5.** Chemiluminescence of TMD-DBAS excitation in the presence of **baicalein**.

**(A)** TMD-DBAS chemiluminescence with respect to time at different concentrations of baicalein.

**(B)**  $IC_{50}$  curve for the percentage of reduction of chemiluminescence of TMD-DBAS excitation vs logarithm of concentration baicalein.

**(C)** TMD-DBAS chemiluminescence with respect to concentration of baicalein at different cycles of measurement (1 cycle = 63 s).

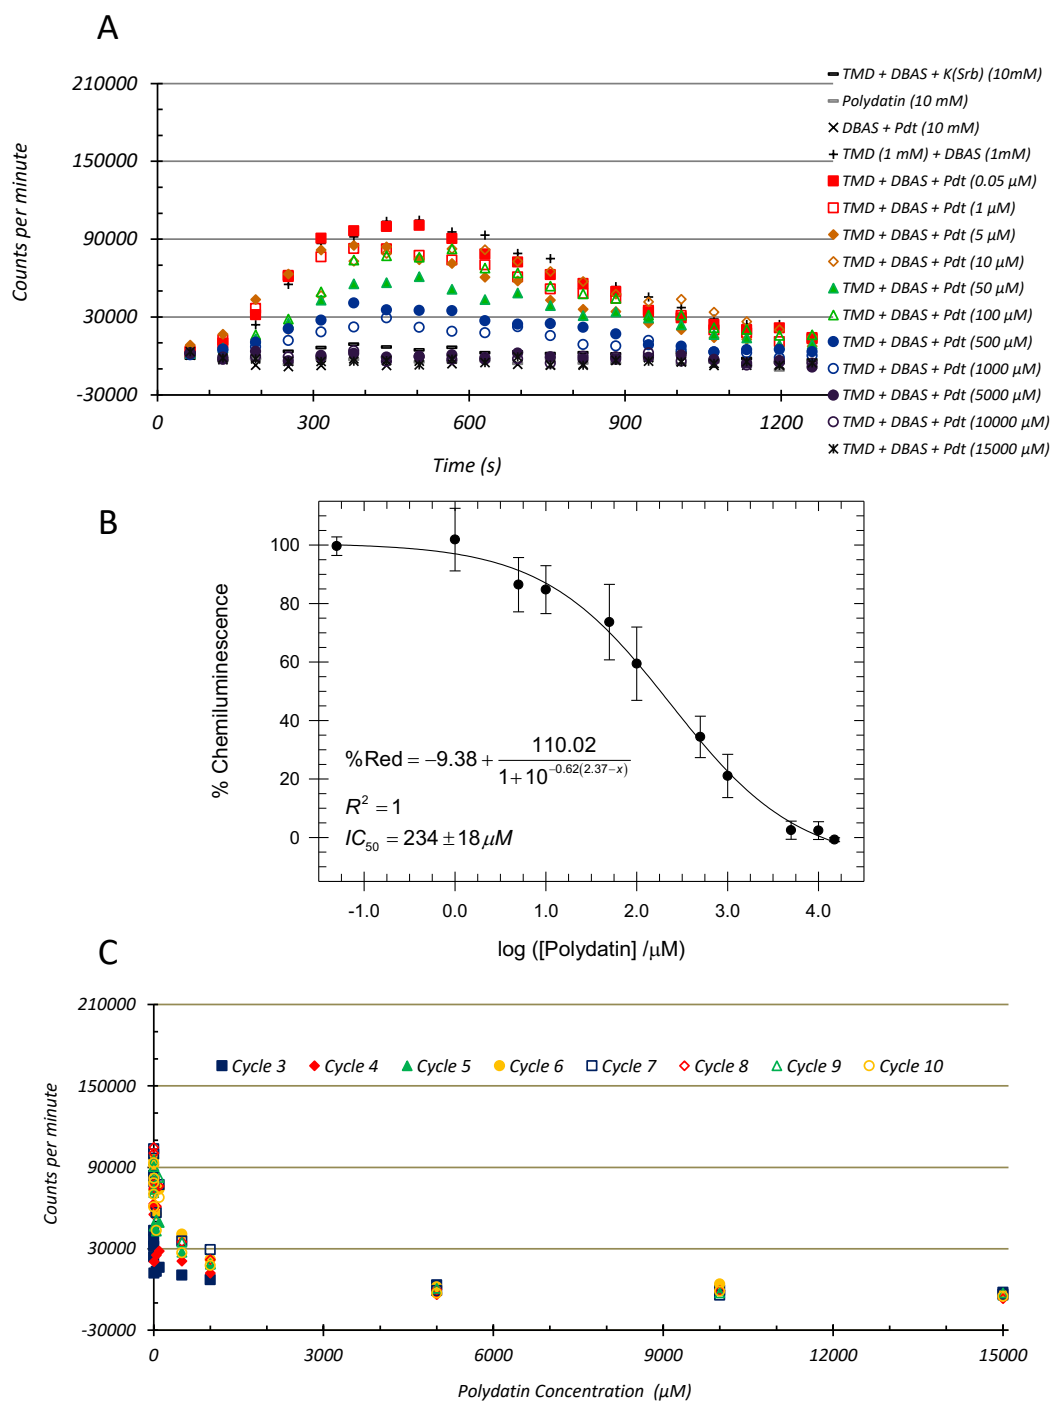

**Figure S6.** Chemiluminescence of TMD-DBAS excitation in the presence of **polydatin**.

**(A)** TMD-DBAS chemiluminescence with respect to time at different concentrations of polydatin.

**(B)**  $IC_{50}$  curve for the percentage of reduction of chemiluminescence of TMD-DBAS excitation vs logarithm of concentration polydatin.

**(C)** TMD-DBAS chemiluminescence with respect to concentration of polydatin at different cycles of measurement (1 cycle = 63 s).

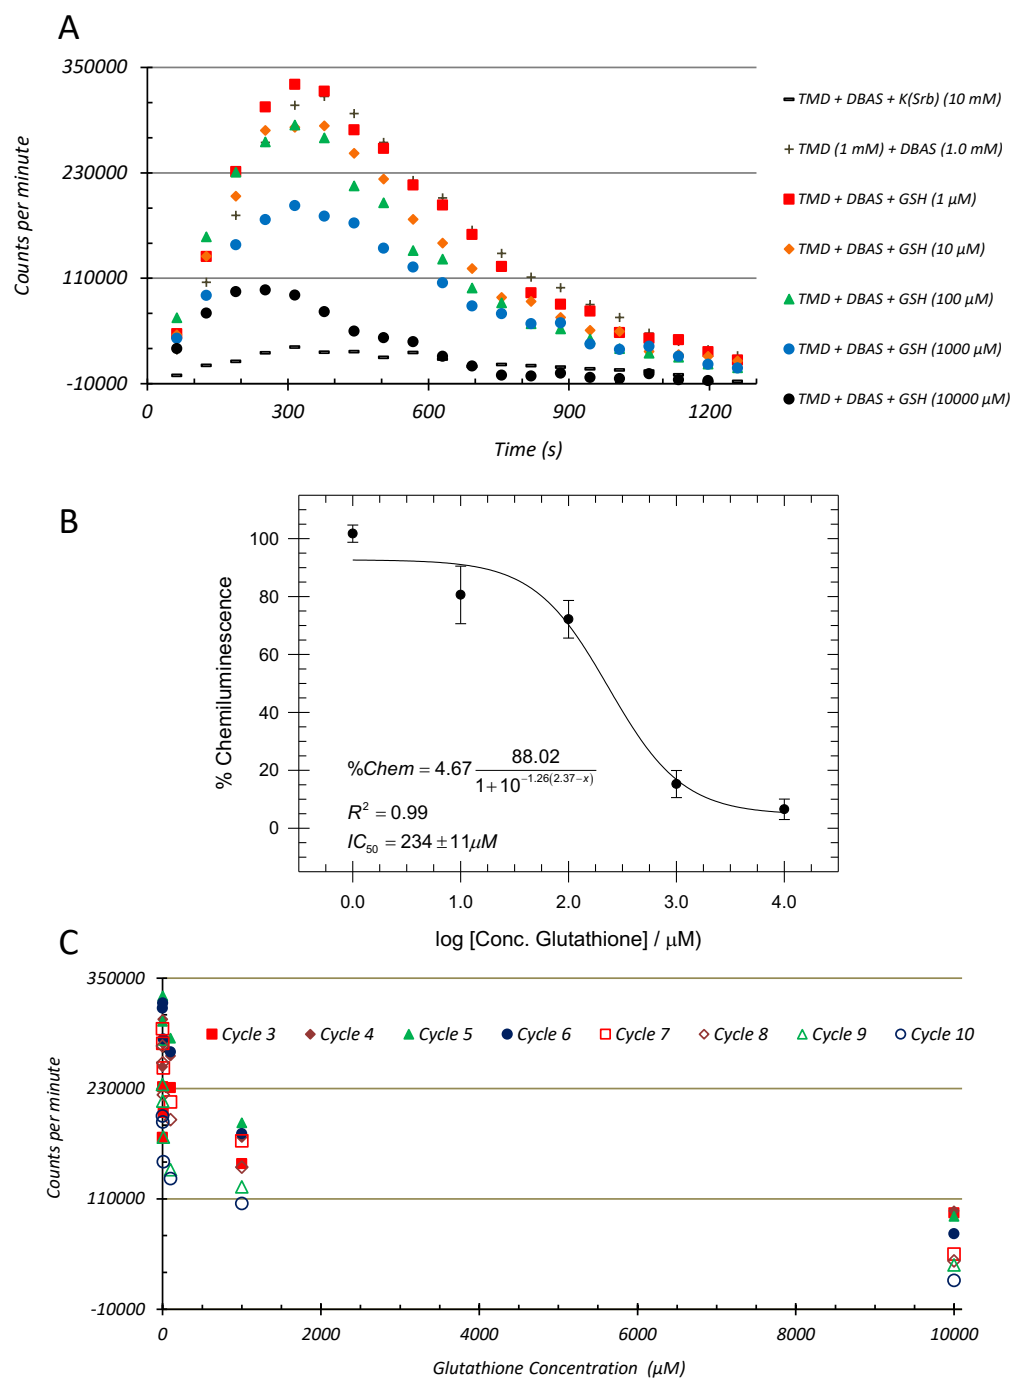

**Figure S7.** Chemiluminescence of TMD-DBAS excitation in the presence of **glutathione**.

**(A)** TMD-DBAS chemiluminescence with respect to time at different concentrations of glutathione.

**(B)**  $IC_{50}$  curve for the percentage of reduction of chemiluminescence of TMD-DBAS excitation vs logarithm of concentration glutathione.

**(C)** TMD-DBAS chemiluminescence with respect to concentration of glutathione at different cycles of measurement (1 cycle = 63 s).

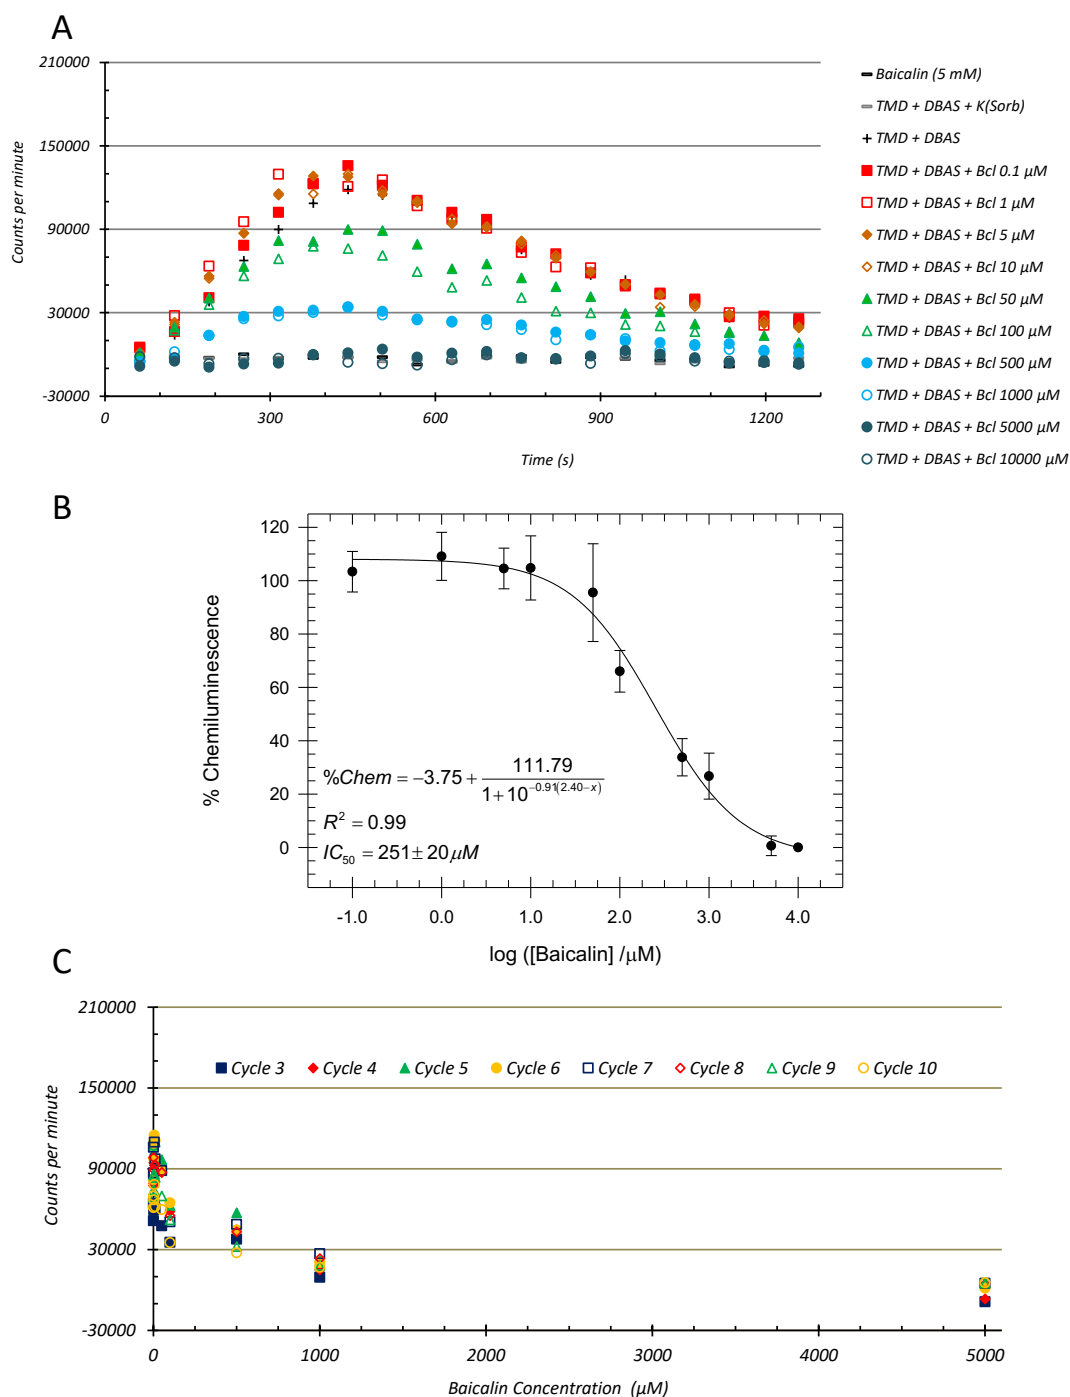

**Figure S8.** Chemiluminescence of TMD-DBAS excitation in the presence of **baicalin**.

**(A)** TMD-DBAS chemiluminescence with respect to time at different concentrations of baicalin.

**(B)**  $IC_{50}$  curve for the percentage of reduction of chemiluminescence of TMD-DBAS excitation vs logarithm of concentration of baicalin.

**(C)** TMD-DBAS chemiluminescence with respect to concentration of baicalin at different cycles of measurement (1 cycle = 63 s).

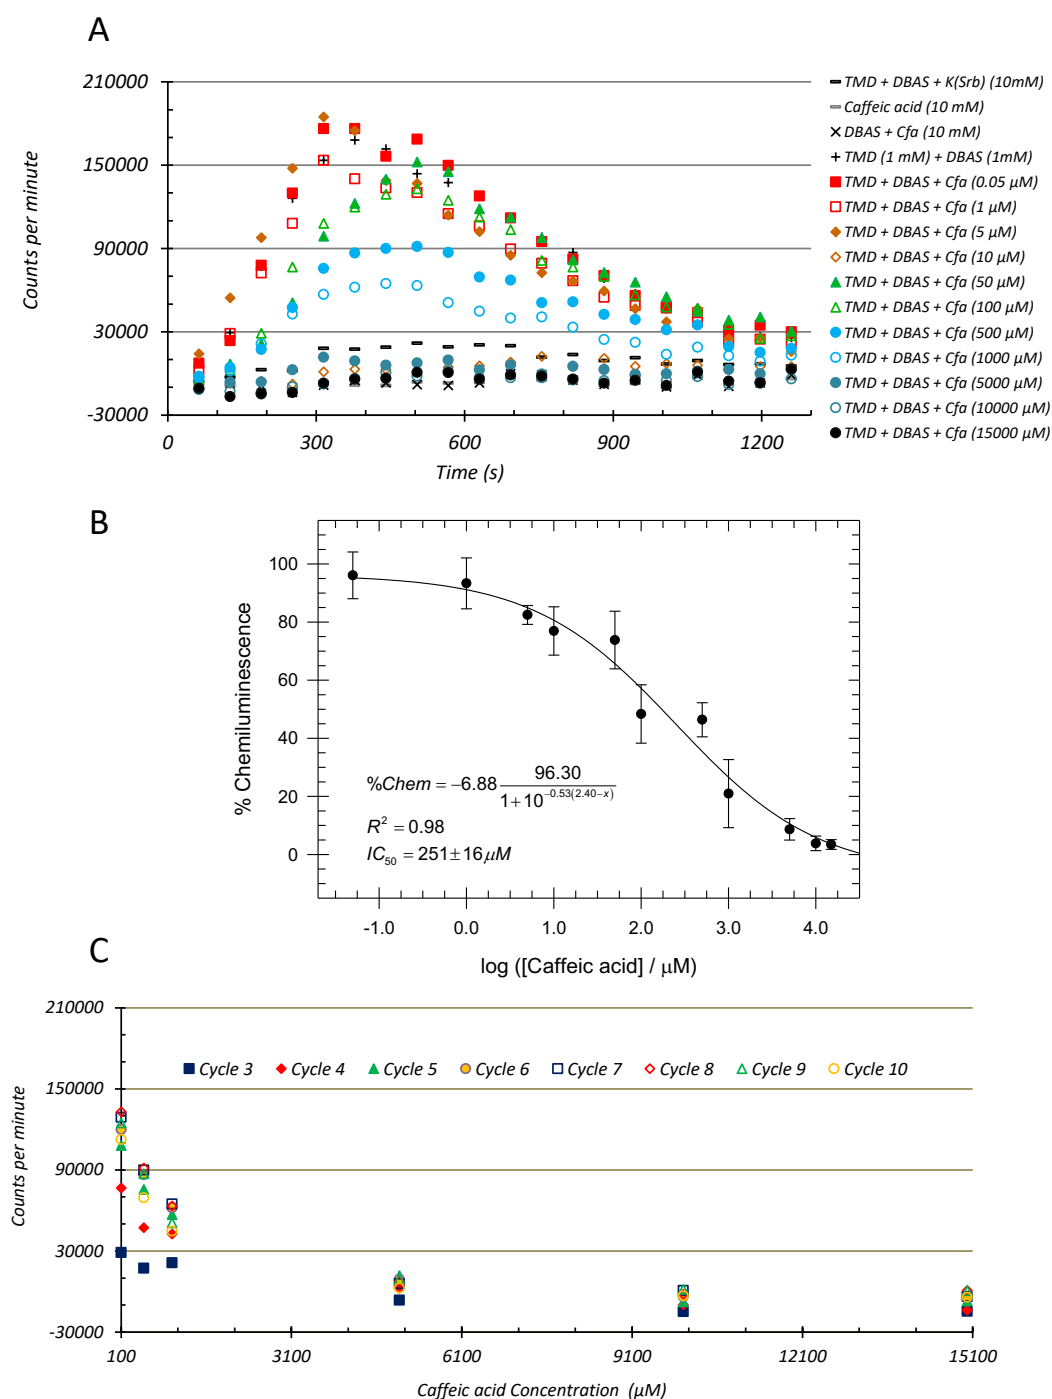

**Figure S9.** Chemiluminescence of TMD-DBAS excitation in the presence of **caffeic acid**.

**(A)** TMD-DBAS chemiluminescence with respect to time at different concentrations of caffeic acid.

**(B)**  $IC_{50}$  curve for the percentage of reduction of chemiluminescence of TMD-DBAS excitation vs logarithm of concentration of caffeic acid.

**(C)** TMD-DBAS chemiluminescence with respect to concentration of caffeic acid at different cycles of measurement (1 cycle = 63 s).

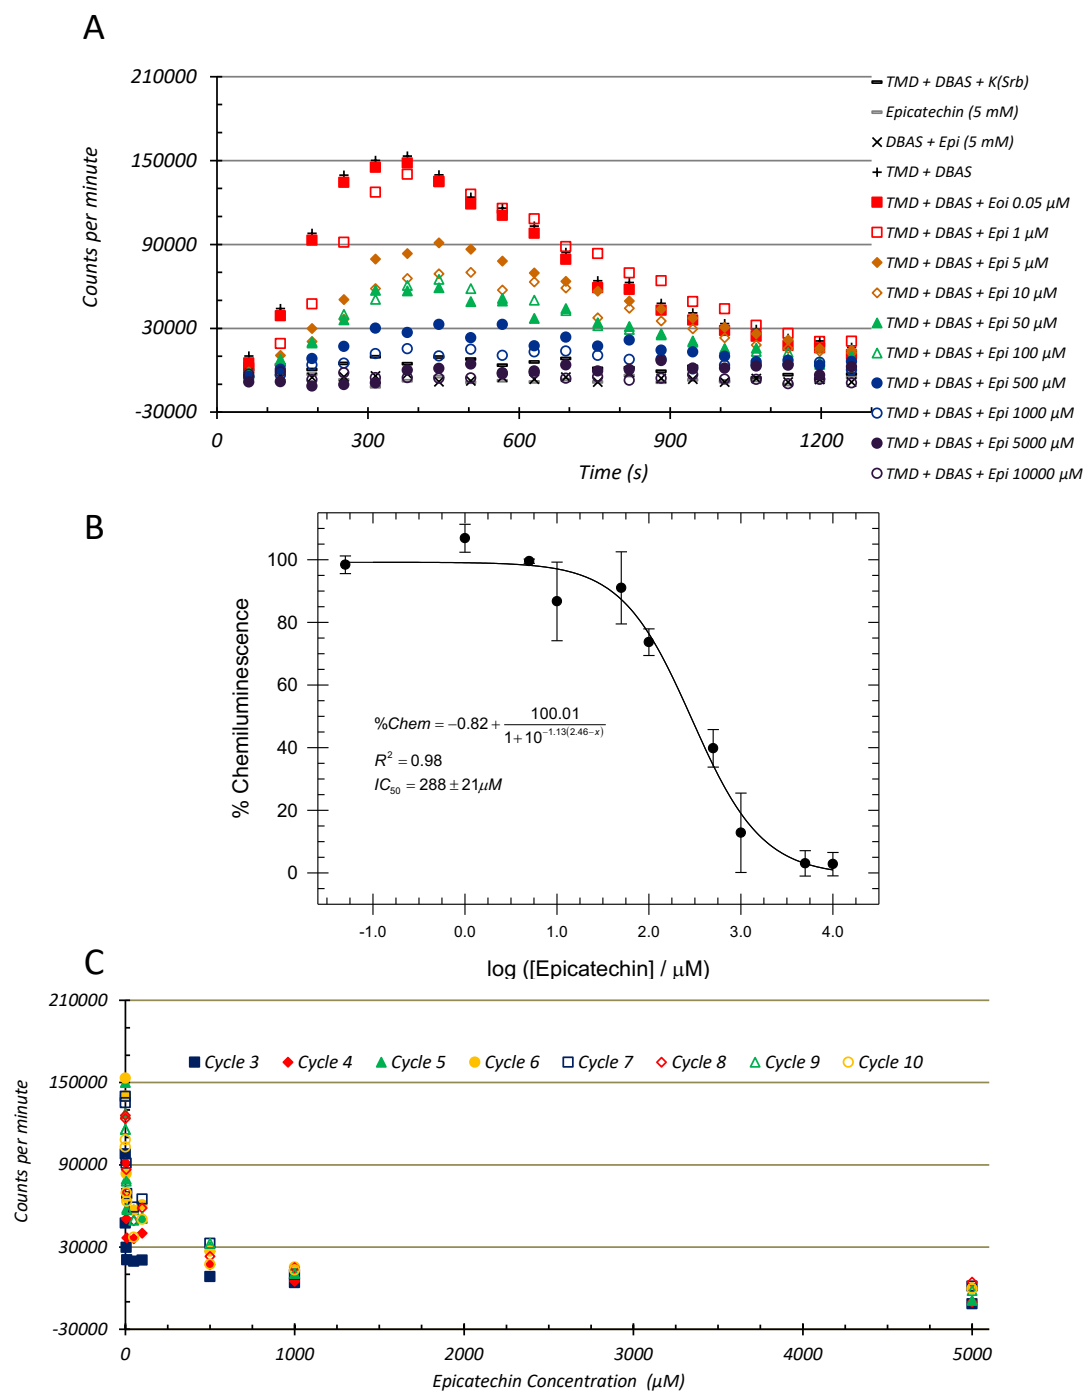

**Figure S10.** Chemiluminescence of TMD-DBAS excitation in the presence of **epicatechin**.

**(A)** TMD-DBAS chemiluminescence with respect to time at different concentrations of catechin.

**(B)**  $IC_{50}$  curve for the percentage of reduction of chemiluminescence of TMD-DBAS excitation vs logarithm of concentration catechin.

**(C)** TMD-DBAS chemiluminescence with respect to concentration of catechin at different cycles of measurement (1 cycle = 63 s).

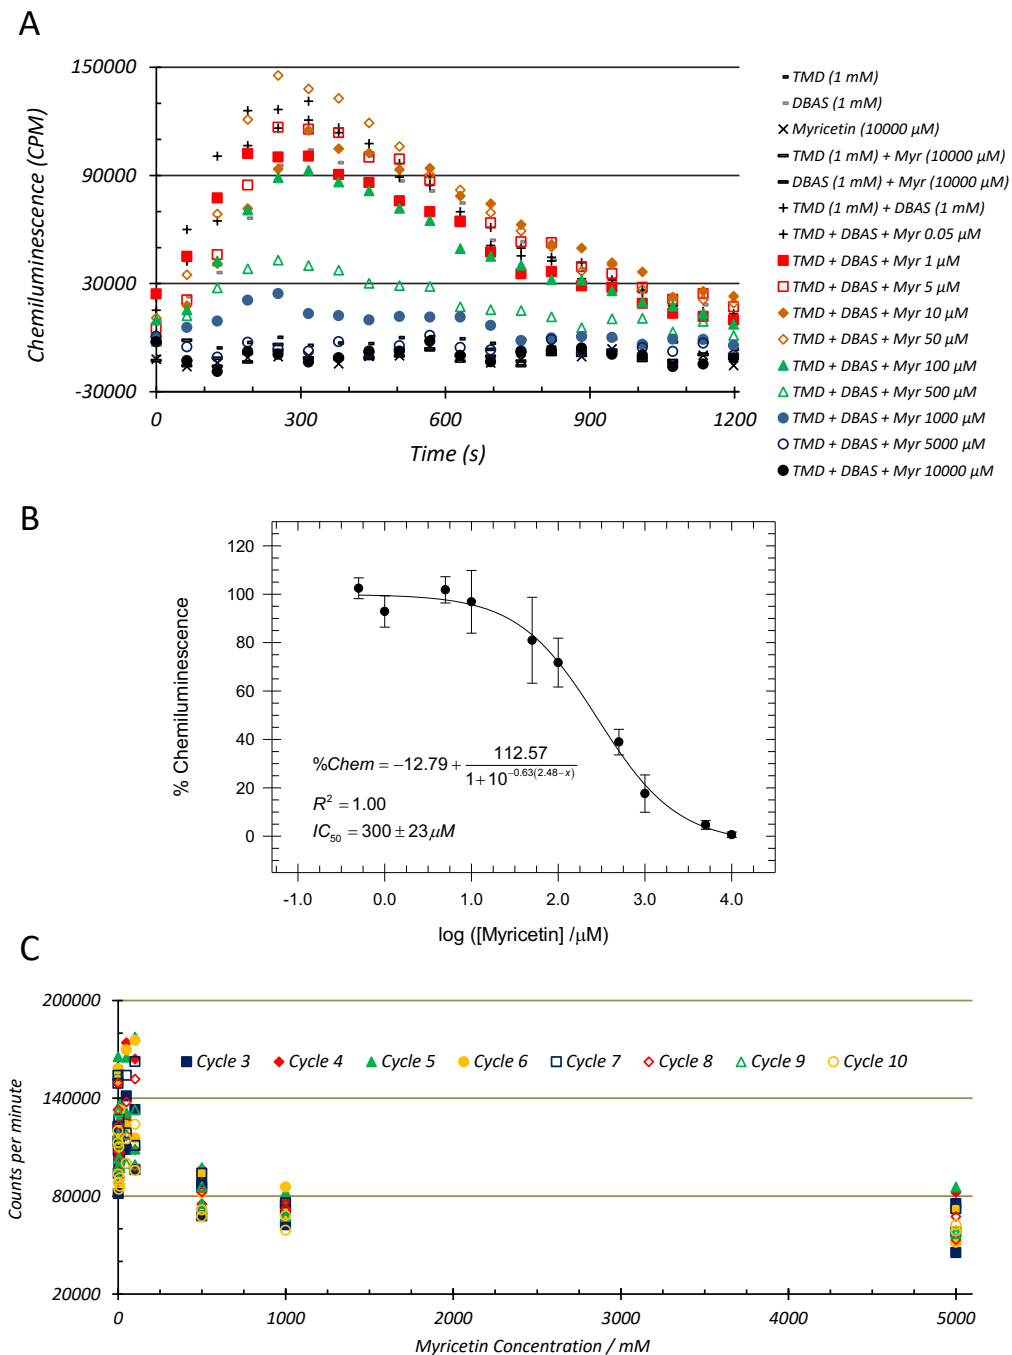

**Figure S11.** Chemiluminescence of TMD-DBAS excitation in the presence of **myricetin**.

**(A)** TMD-DBAS chemiluminescence with respect to time at different concentrations of myricetin.

**(B)**  $IC_{50}$  curve for the percentage of reduction of chemiluminescence of TMD-DBAS excitation vs logarithm of concentration of myricetin.

**(C)** TMD-DBAS chemiluminescence with respect to concentration of myricetin at different cycles of measurement (1 cycle = 63 s).

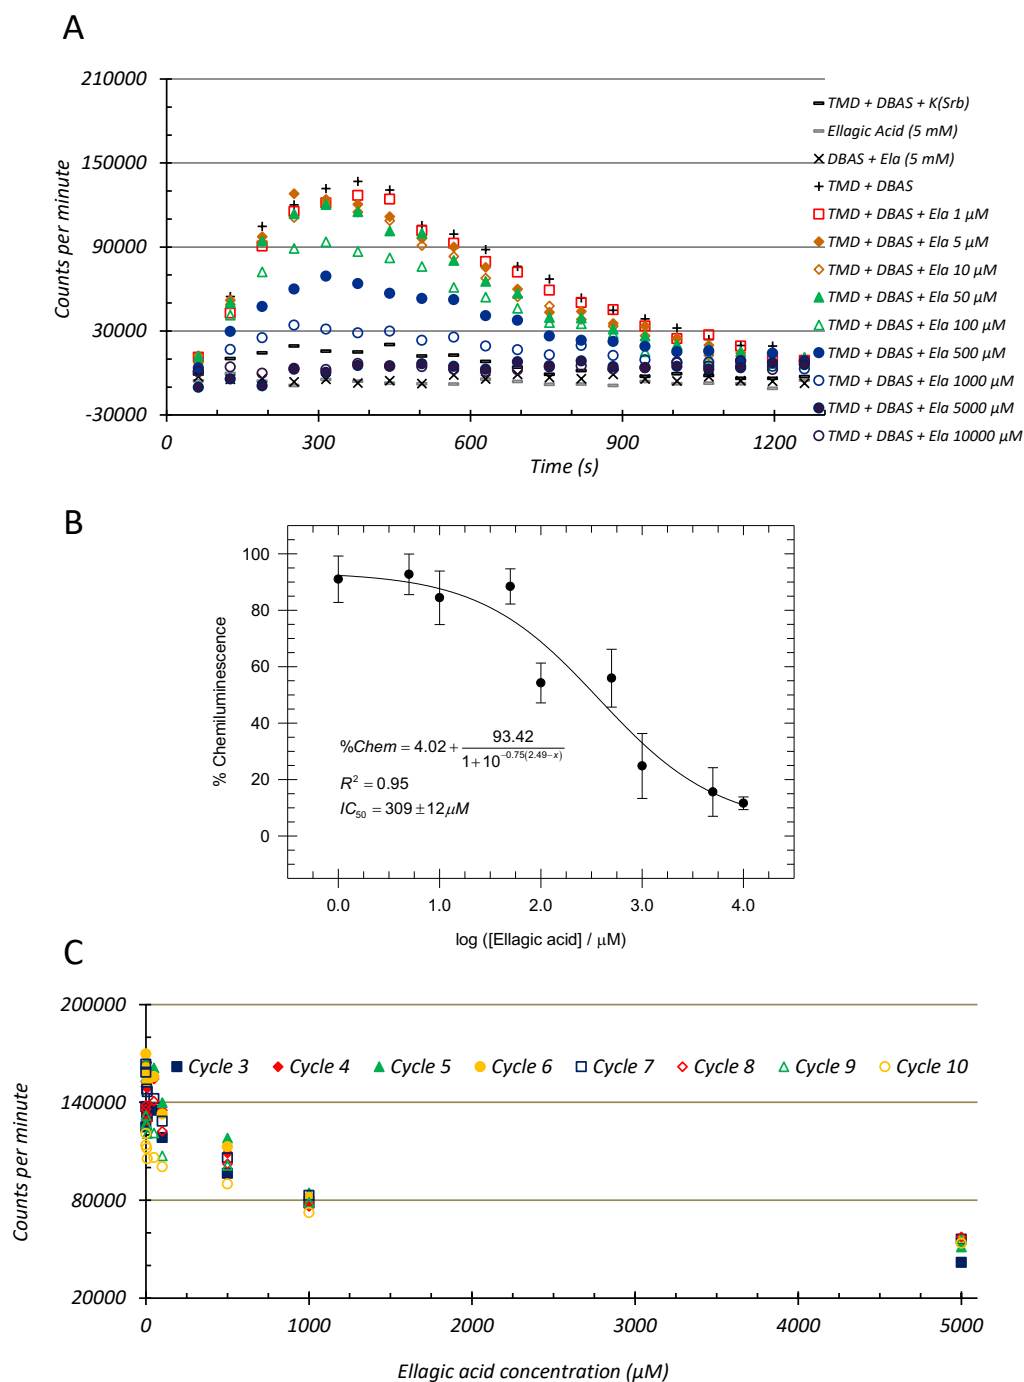

**Figure S12.** Chemiluminescence from TMD-DBAS triplet excitation in the presence of **ellagic acid**.

**(A)** TMD-DBAS chemiluminescence with respect to time at different concentrations of ellagic acid.

**(B)**  $IC_{50}$  curve for the percentage of reduction of chemiluminescence of TMD-DBAS excitation vs logarithm of concentration of ellagic acid.

**(C)** TMD-DBAS chemiluminescence with respect to concentration of ellagic acid at different cycles of measurement (1 cycle = 63 s).

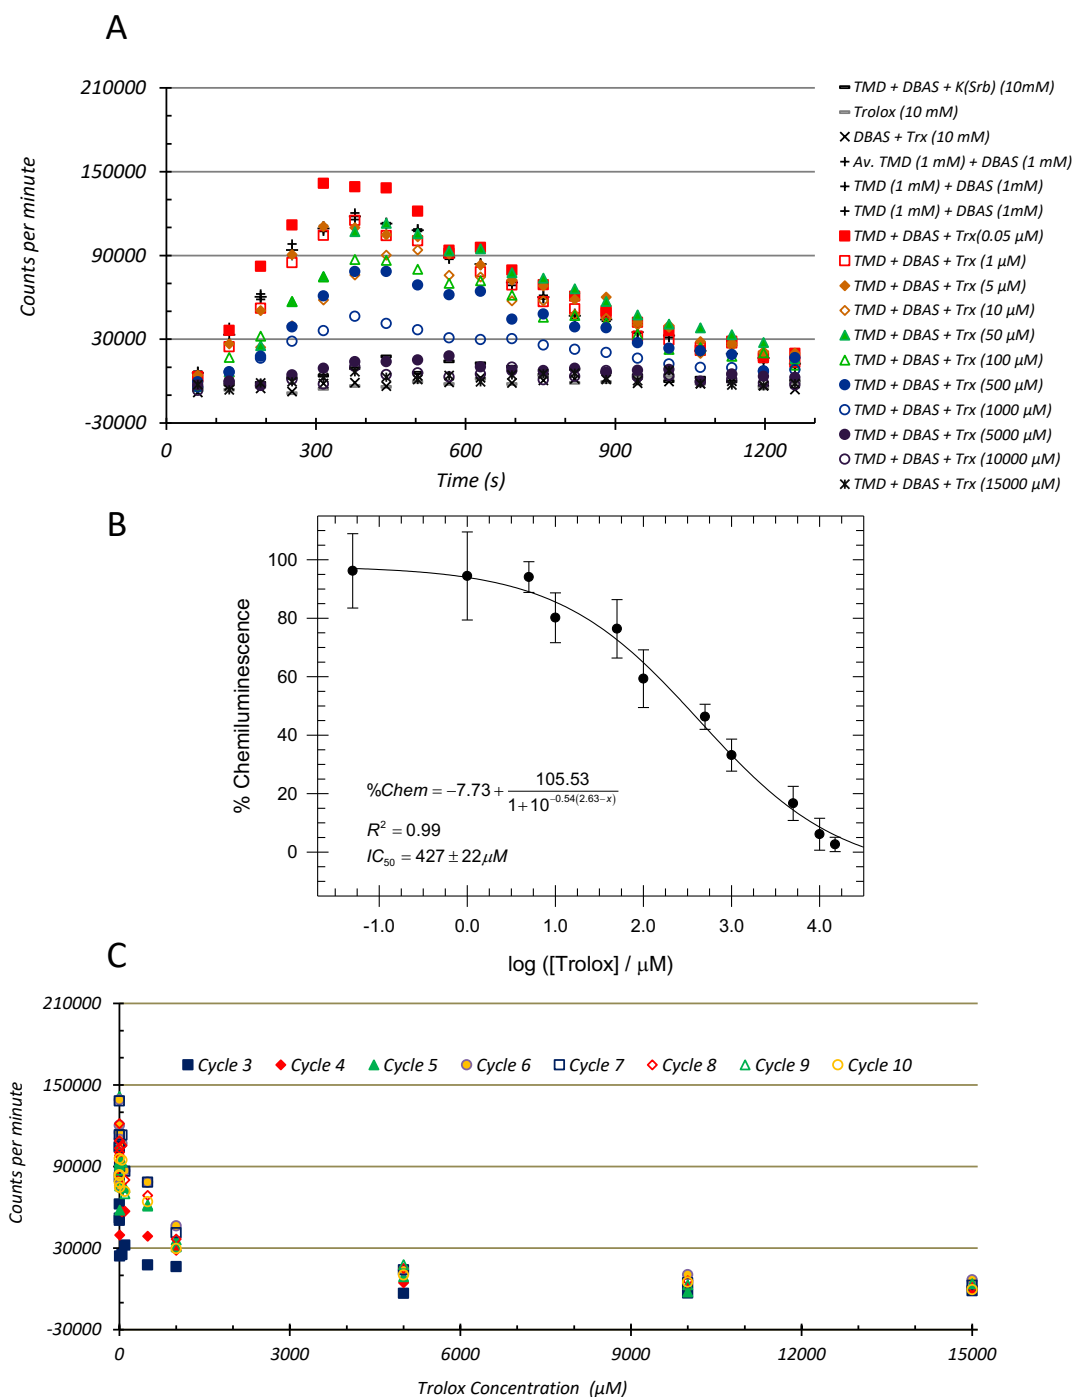

**Figure S13.** Chemiluminescence from TMD-DBAS triplet excitation in the presence of **Trolox**.

**(A)** TMD-DBAS chemiluminescence with respect to time at different concentrations of Trolox.

**(B)**  $IC_{50}$  curve for the percentage of reduction of chemiluminescence of TMD-DBAS excitation vs logarithm of concentration of Trolox.

**(C)** TMD-DBAS chemiluminescence with respect to concentration of Trolox at different cycles of measurement (1 cycle = 63 s).

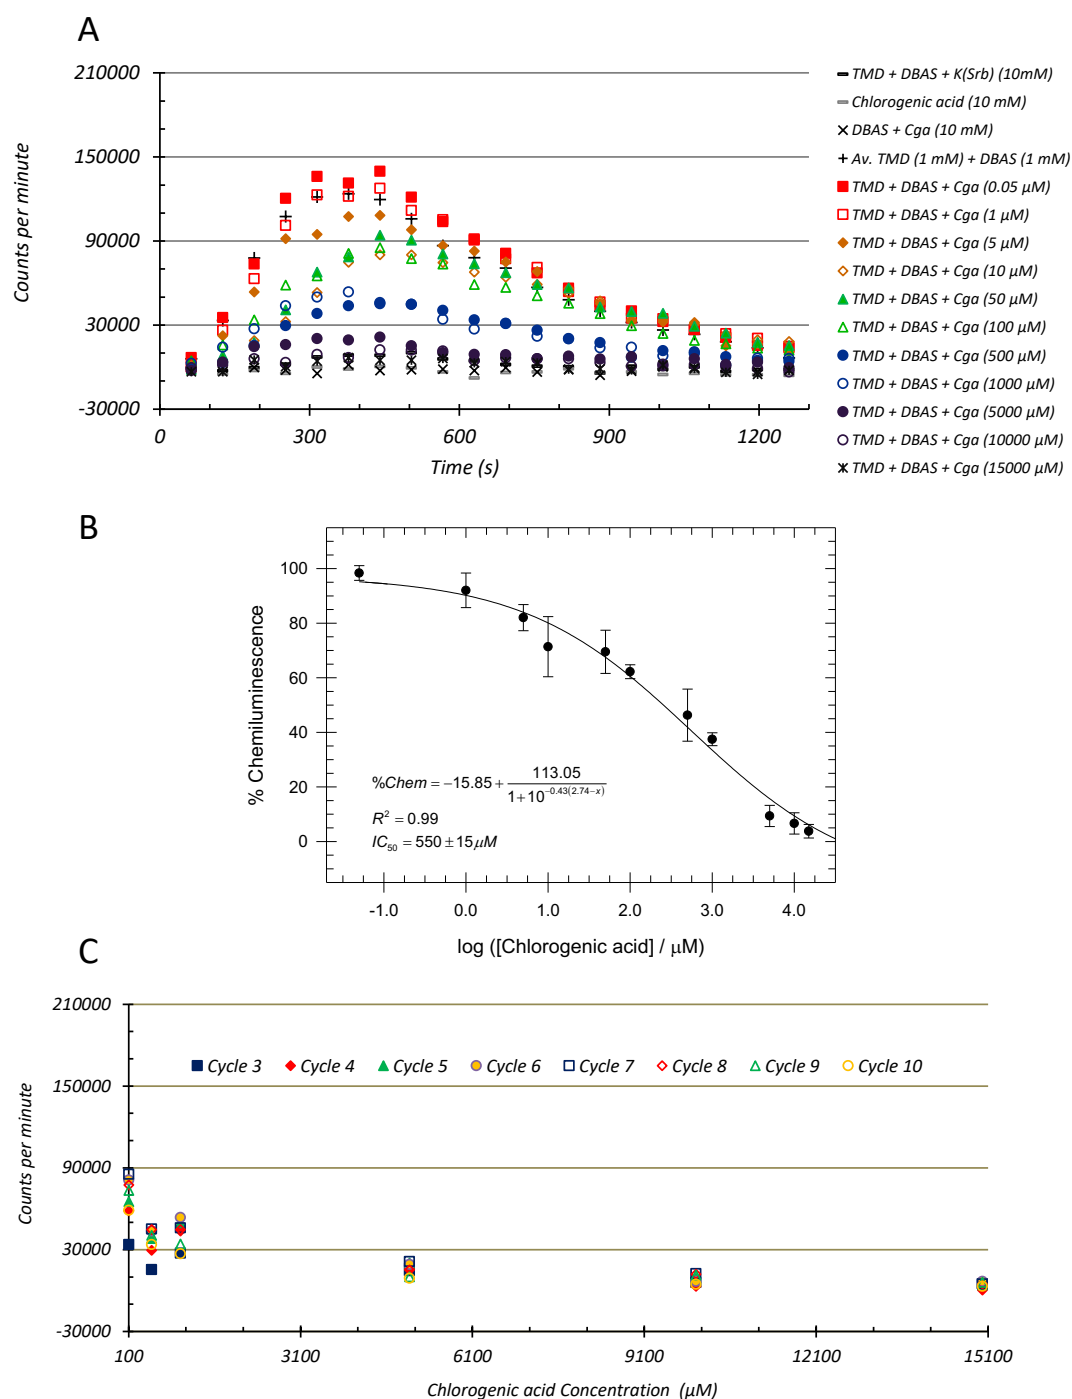

**Figure S14.** Chemiluminescence from TMD-DBAS triplet excitation in the presence of **chlorogenic acid**.

**(A)** TMD-DBAS chemiluminescence with respect to time at different concentrations of chlorogenic acid.

**(B)**  $IC_{50}$  curve for the percentage of reduction of chemiluminescence of TMD-DBAS excitation vs logarithm of concentration of chlorogenic acid.

**(C)** TMD-DBAS chemiluminescence with respect to concentration of chlorogenic acid at different cycles of measurement (1 cycle = 63 s).

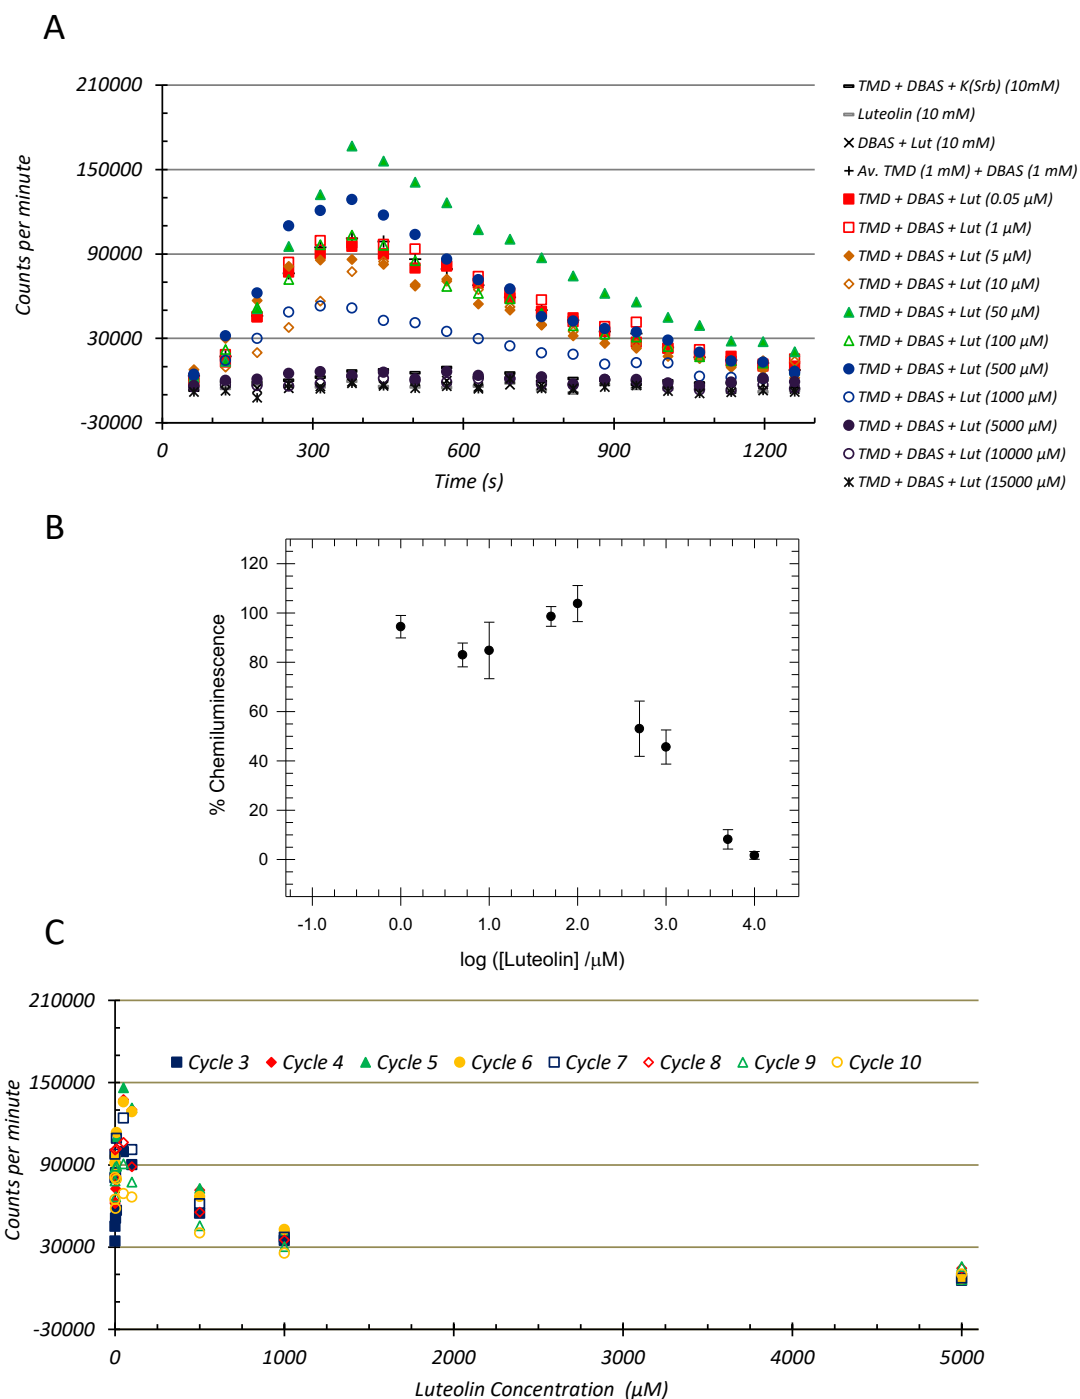

**Figure S15.** Chemiluminescence of TMD-DBAS excitation in the presence of **luteolin**.

**(A)** TMD-DBAS chemiluminescence with respect to time at different concentrations of luteolin.

**(B)**  $IC_{50}$  curve for the percentage of reduction of chemiluminescence of TMD-DBAS excitation vs logarithm of concentration of luteolin.

**(C)** TMD-DBAS chemiluminescence with respect to concentration of luteolin at different cycle of measurement (1 cycle = 63 s).

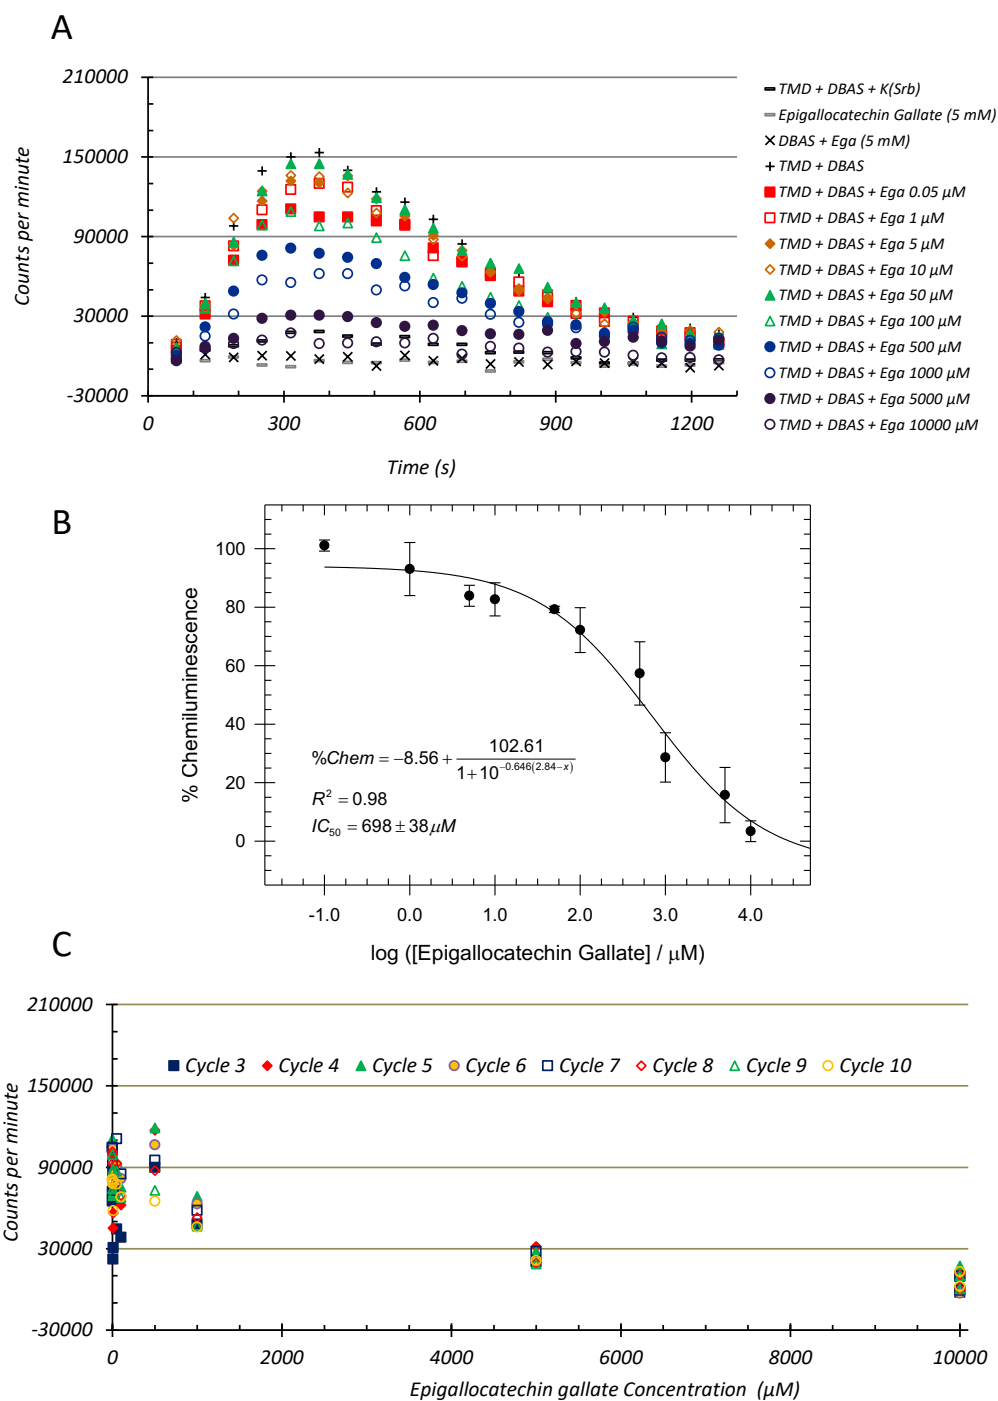

**Figure S16.** Chemiluminescence of TMD-DBAS excitation in the presence of **epigallocatechin gallate**.

**(A)** TMD-DBAS chemiluminescence with respect to time at different concentrations of epigallocatechin gallate.

**(B)**  $IC_{50}$  curve for the percentage of reduction of chemiluminescence of TMD-DBAS excitation vs logarithm of concentration of epigallocatechin gallate.

**(C)** TMD-DBAS chemiluminescence with respect to concentration of epigallocatechin gallate at different cycles of measurement (1 cycle = 63 s).

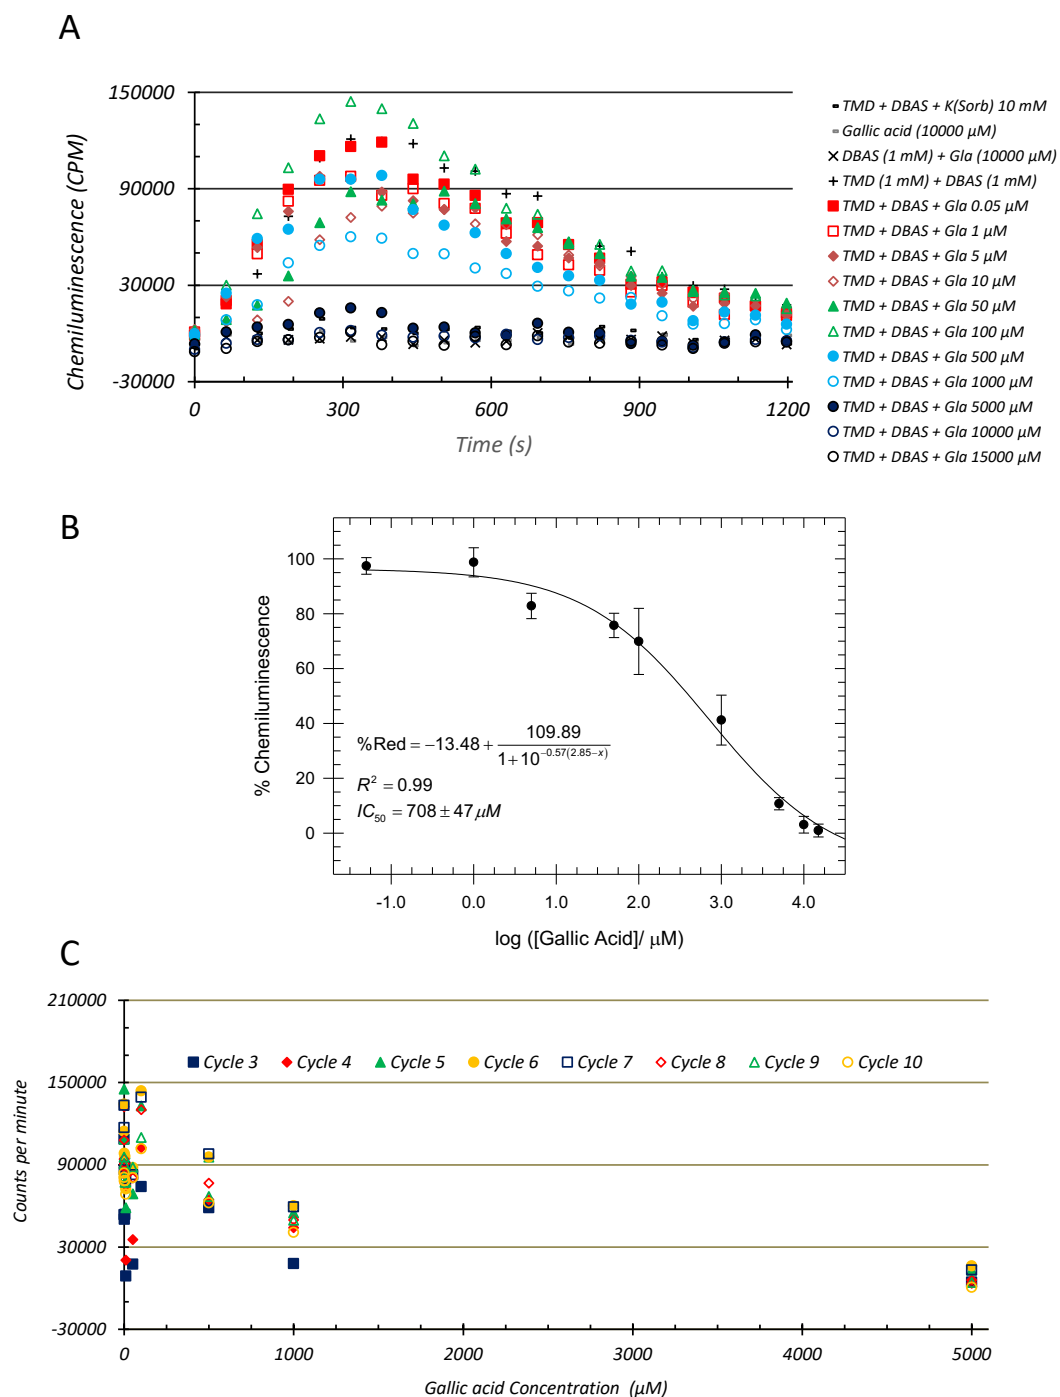

**Figure S17.** Chemiluminescence of TMD-DBAS excitation in the presence of **gallic acid**.

**(A)** TMD-DBAS chemiluminescence with respect to time at different concentrations of gallic acid.

**(B)**  $IC_{50}$  curve for the percentage of reduction of chemiluminescence of TMD-DBAS excitation vs logarithm of concentration of gallic acid.

**(C)** TMD-DBAS chemiluminescence with respect to concentration of gallic acid at different cycles of measurement (1 cycle = 63 s).

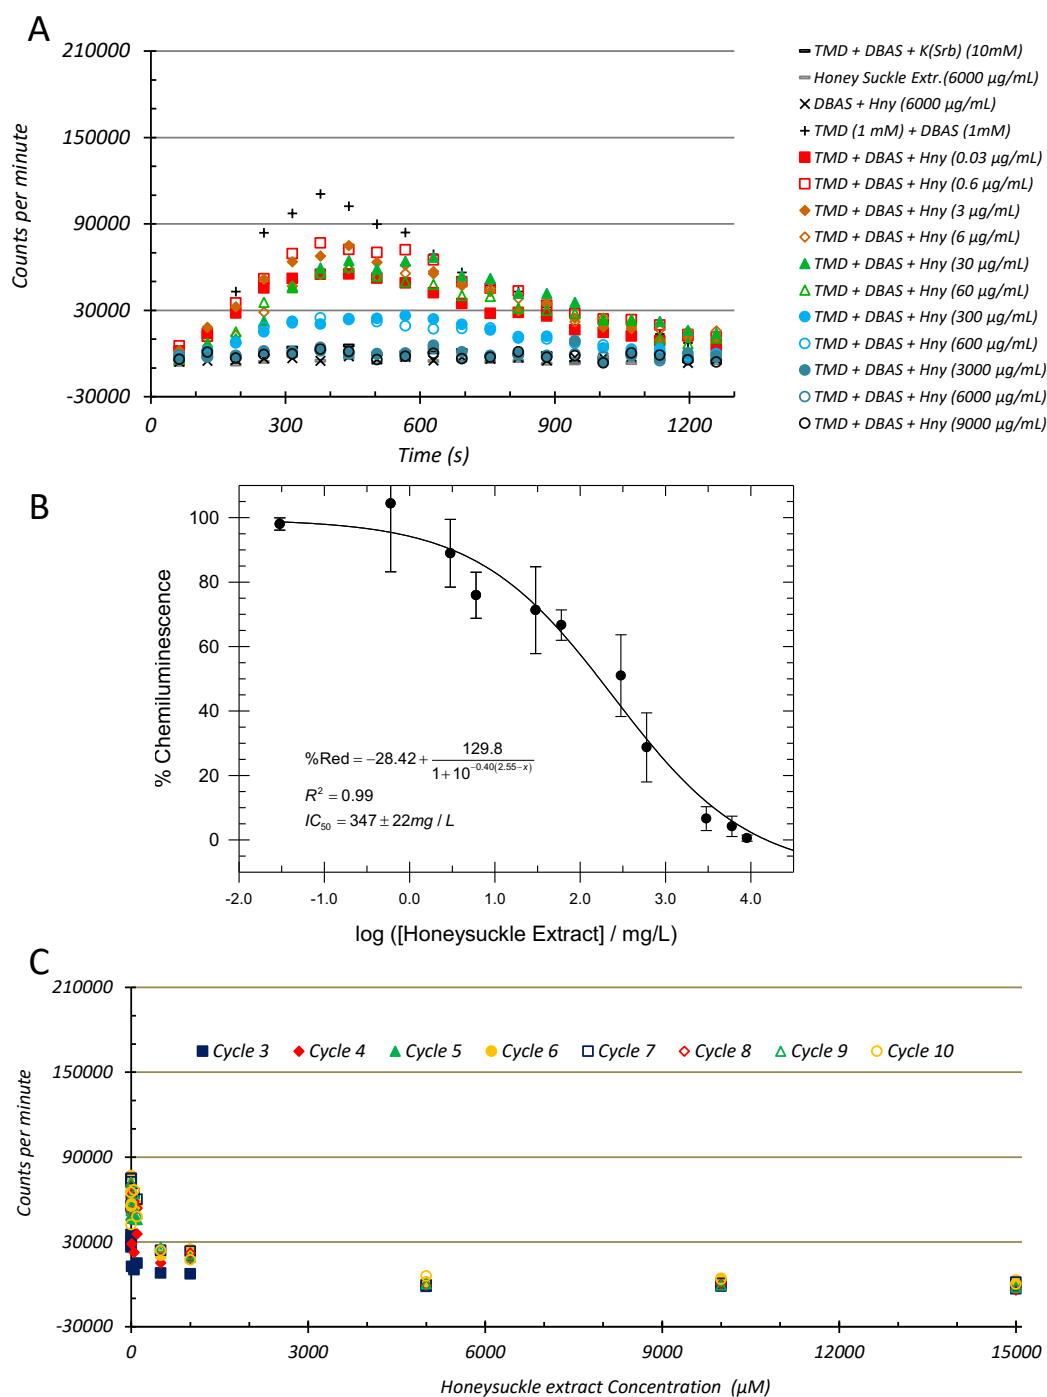

**Figure S18.** Chemiluminescence of TMD-DBAS triplet excitation in the presence of **honeysuckle extract**.

**(A)** TMD-DBAS chemiluminescence with respect to time at different concentrations of honeysuckle extract.

**(B)**  $IC_{50}$  curve for the percentage of reduction of chemiluminescence of TMD-DBAS excitation vs logarithm of concentration of honeysuckle extract.

**(C)** TMD-DBAS chemiluminescence with respect to concentration of honeysuckle extract at different cycles of measurement (1 cycle = 63 s).

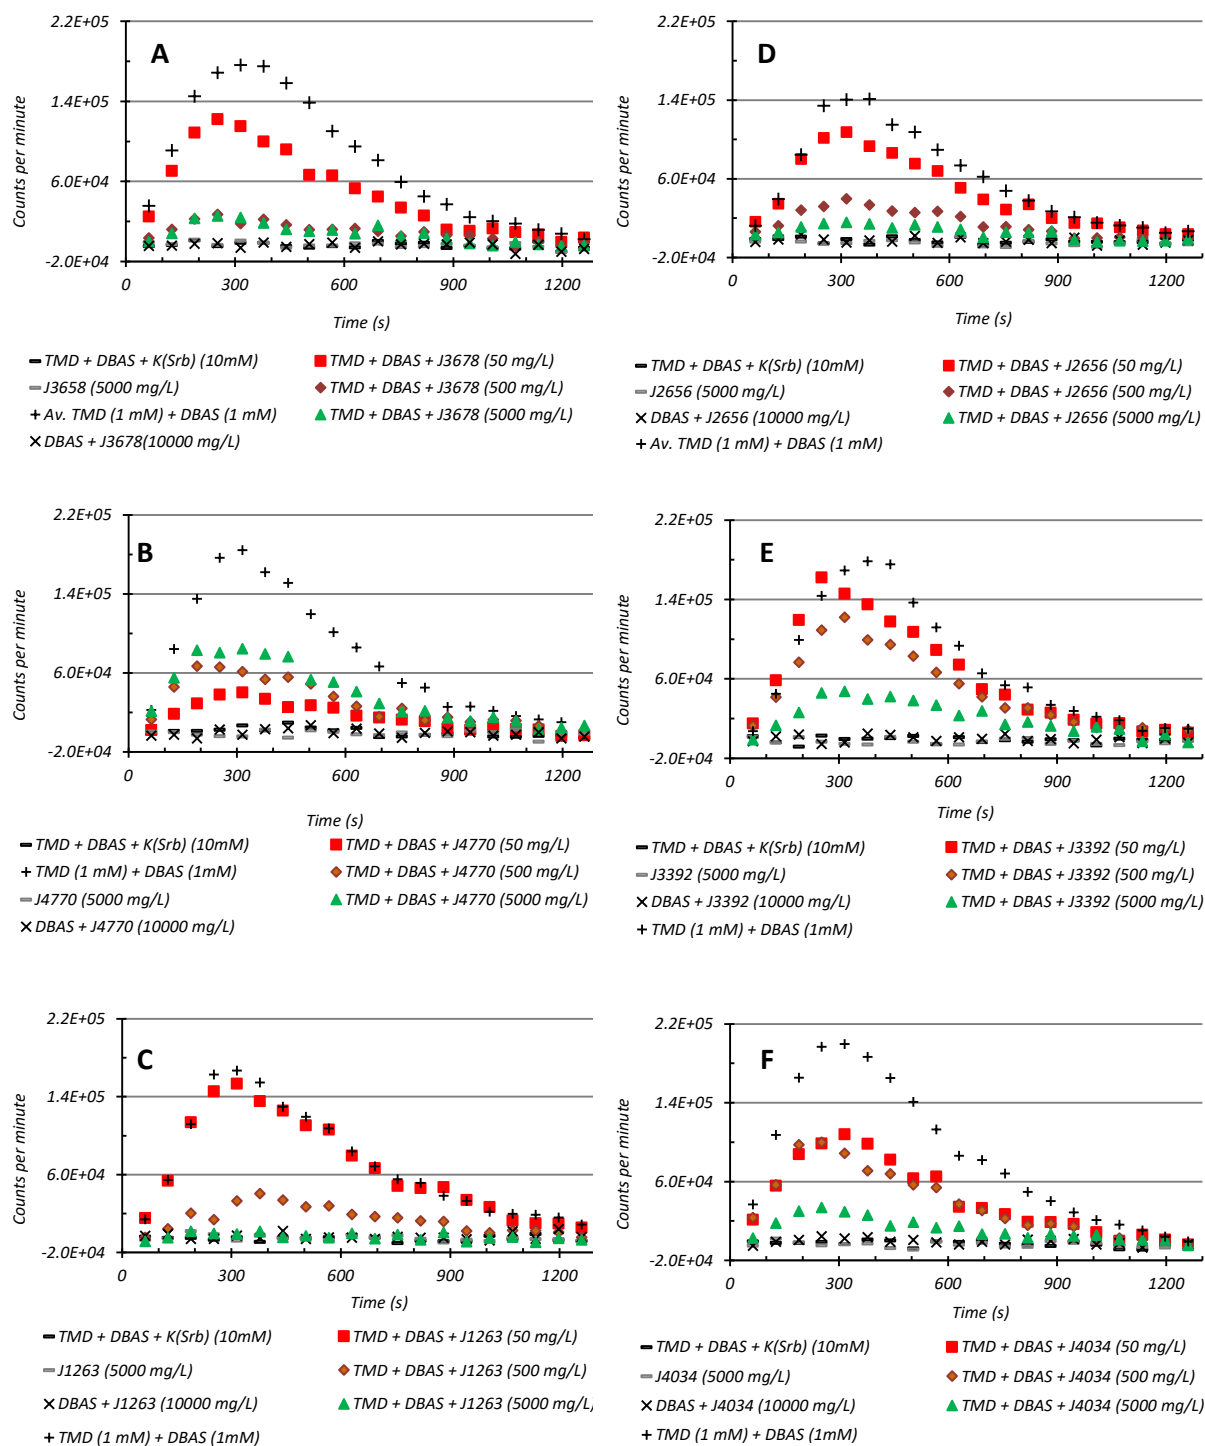

**Figure S19.** Chemiluminescence of TMD-DBAS triplet excitation in the presence of algae extracts (A) J3678, (B) J4770, (C) J1263, (D) J2656, (E) J3392, and (F) J4034.

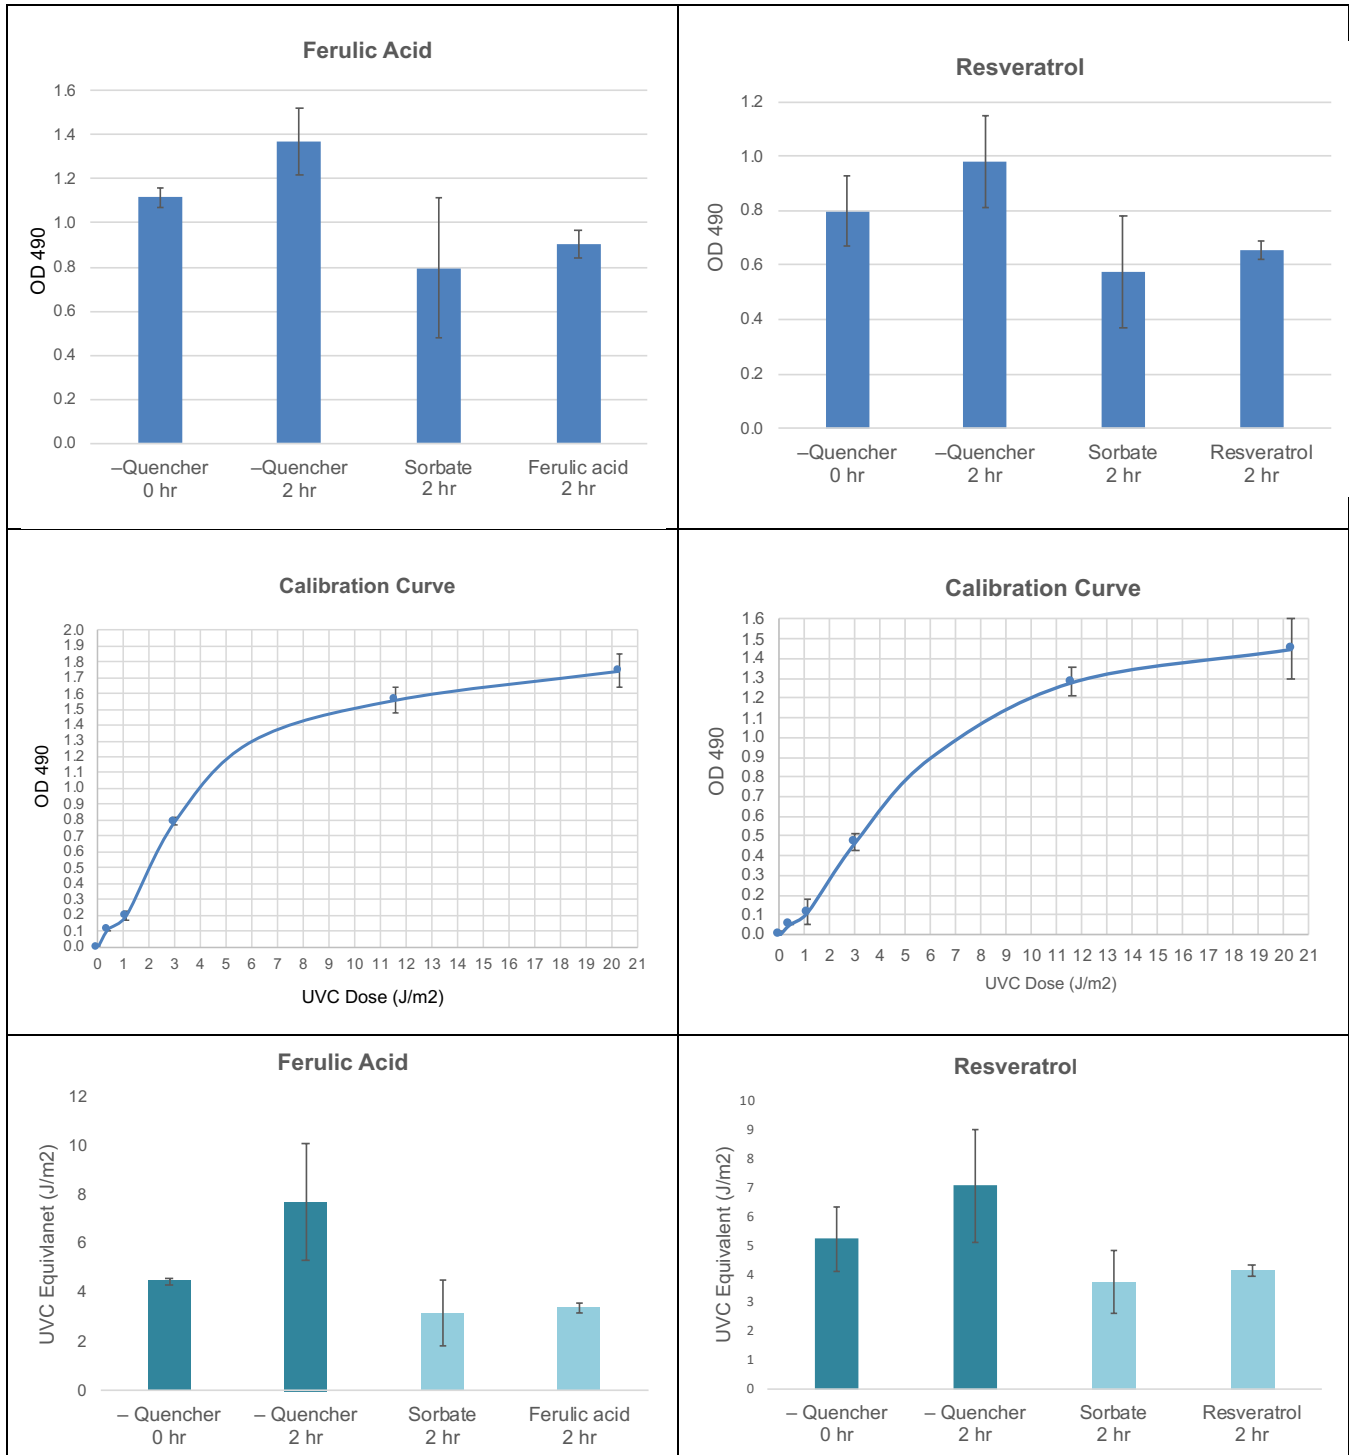

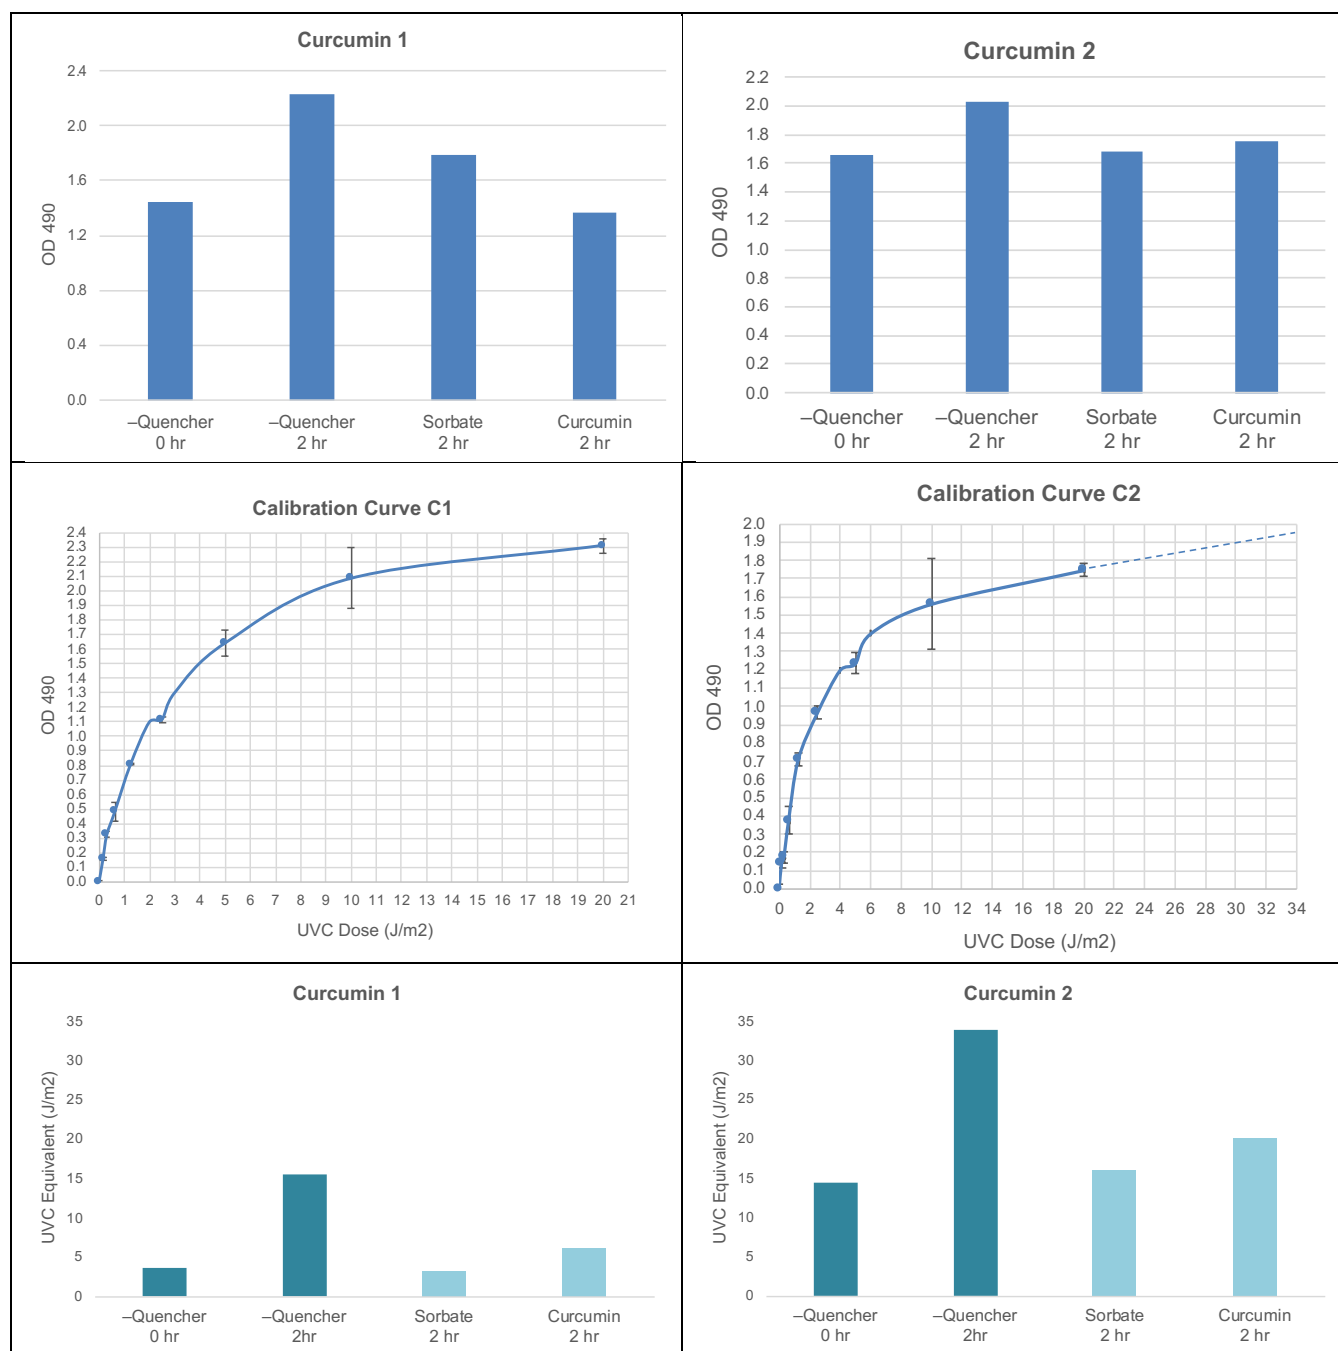

**Figure S20.** dCPD quenching activity before and after correcting for ELISA assay nonlinearity by using the UVC calibration curve.

C57BL/6 murine melanocytes were exposed in PBS to 75 kJ/m<sup>2</sup> UVA, the PBS was replaced with medium, and 0 or 100  $\mu$ M quencher added. Because the ELISA immunoassay for CPDs is non-linear, the ELISA signals for each experiment were calibrated in terms of equivalent UVC dose using a calibration curve constructed from UVC-irradiated DNA analyzed on the same ELISA plate on the same day.

(Top 3 rows, left) Ferulic acid and potassium sorbate positive control.

(Top 3 rows, right) Resveratrol and potassium sorbate.

(Lower 3 rows) Curcumin and potassium sorbate. Error bars reflect repeats performed on separate days.

**Table S1.** Triplet-state quenching survey.

| Compound                                                                                      | DBAS Assay:                                                                  |                                                                                                             | CPD Assay:                                                                                                                                |                                                       |                                                               |                                                                                                               | UVA dCPD in melanocytes I<br>(as for dCPD I,<br>plus cell uptake) | UVA dCPD in melanocytes II<br>w/ standard curve<br>(as for melano I) |
|-----------------------------------------------------------------------------------------------|------------------------------------------------------------------------------|-------------------------------------------------------------------------------------------------------------|-------------------------------------------------------------------------------------------------------------------------------------------|-------------------------------------------------------|---------------------------------------------------------------|---------------------------------------------------------------------------------------------------------------|-------------------------------------------------------------------|----------------------------------------------------------------------|
|                                                                                               | TMD-DBAS Chemilum I<br>detects<br>triplet quenching or<br>dioxetane scission | ONOO/melanin Chemilum<br>detects<br>triplet quenching, dioxetane<br>scission, or radical/ONOO<br>scavenging | ONOO/melatonin dCPD I<br>ELISA-OD<br>detects<br>triplet quenching,<br>dioxetane scission,<br>radical/ONOO scavenging,<br>or CPD splitting | ONOO/melatonin dCPD II<br>ELISA-OD<br>(as for dCPD I) | ONOO/melatonin dCPD III<br>ELISA-Dynalight<br>(as for dCPD I) | ONOO/drug-alone dCPD<br>ELISA-OD<br>detects cmp enhancement<br>of DBAS energy transfer or<br>dioxetane on cmp |                                                                   |                                                                      |
|                                                                                               | aqueous                                                                      | DMSO                                                                                                        | aqueous                                                                                                                                   | aqueous                                               | aqueous                                                       | aqueous                                                                                                       | aqueous                                                           | aqueous                                                              |
| DBAS                                                                                          |                                                                              |                                                                                                             |                                                                                                                                           | ++                                                    |                                                               | XX                                                                                                            | ++                                                                |                                                                      |
| curcumin                                                                                      | interpolation ~100 uM                                                        | +++                                                                                                         | ++                                                                                                                                        | ++                                                    | +                                                             | XX                                                                                                            | no effect                                                         | +++                                                                  |
| resveratrol                                                                                   | ~300                                                                         | XX                                                                                                          |                                                                                                                                           | ++                                                    |                                                               | X                                                                                                             |                                                                   | +++                                                                  |
| sorbic acid                                                                                   | ~300                                                                         | ++                                                                                                          | +                                                                                                                                         | +                                                     | ++                                                            | X                                                                                                             | no effect                                                         |                                                                      |
| ethyl sorbate                                                                                 |                                                                              |                                                                                                             |                                                                                                                                           |                                                       |                                                               |                                                                                                               | ++                                                                |                                                                      |
| potassium sorbate                                                                             |                                                                              |                                                                                                             |                                                                                                                                           |                                                       |                                                               |                                                                                                               |                                                                   | +++                                                                  |
| ferulic acid                                                                                  |                                                                              | ++                                                                                                          | ++                                                                                                                                        | +                                                     | ++                                                            | X                                                                                                             | +                                                                 |                                                                      |
| polydatin                                                                                     | ~200                                                                         | little effect                                                                                               |                                                                                                                                           | +                                                     |                                                               | no CPDs                                                                                                       | no effect                                                         |                                                                      |
| baicalin                                                                                      | ~300                                                                         | +++                                                                                                         |                                                                                                                                           | ++ (only if fresh)                                    | ++                                                            | no CPDs                                                                                                       | no effect                                                         |                                                                      |
| ellagic acid                                                                                  |                                                                              | +++                                                                                                         | +                                                                                                                                         |                                                       | +                                                             | no CPDs                                                                                                       | no effect                                                         |                                                                      |
| Trolox                                                                                        | ~600                                                                         |                                                                                                             |                                                                                                                                           |                                                       |                                                               |                                                                                                               |                                                                   |                                                                      |
| luteolin                                                                                      |                                                                              | ++ (X at low conc)                                                                                          |                                                                                                                                           | XX                                                    | +++                                                           | XX                                                                                                            |                                                                   |                                                                      |
| epigallocatechin gallate                                                                      |                                                                              | ++                                                                                                          |                                                                                                                                           |                                                       | +                                                             | XXX                                                                                                           |                                                                   |                                                                      |
| retinol (vitamin A)                                                                           | ~300 (poor solubility)                                                       | X                                                                                                           |                                                                                                                                           |                                                       |                                                               | no CPDs                                                                                                       |                                                                   |                                                                      |
| β-carotene                                                                                    | ~300 (poor solubility)                                                       | + (poor solubility)                                                                                         |                                                                                                                                           |                                                       |                                                               | no CPDs                                                                                                       |                                                                   |                                                                      |
| squalene                                                                                      | ~300                                                                         | little effect                                                                                               | no effect                                                                                                                                 |                                                       |                                                               | no CPDs                                                                                                       |                                                                   |                                                                      |
| dipicolinic acid                                                                              |                                                                              | +++                                                                                                         |                                                                                                                                           |                                                       |                                                               | XX                                                                                                            |                                                                   |                                                                      |
| quinolinic acid                                                                               |                                                                              |                                                                                                             |                                                                                                                                           | +                                                     |                                                               | ~no CPDs                                                                                                      | +                                                                 |                                                                      |
| Honeysuckle extract<br>(chlorogenic acids, rutin,<br>quercetin, and cyanidin-3-<br>glucoside) |                                                                              | little effect                                                                                               |                                                                                                                                           |                                                       |                                                               | no CPDs                                                                                                       |                                                                   |                                                                      |
| Ampelopsis extract<br>(90% dihydromyricetin)                                                  |                                                                              | XXX                                                                                                         |                                                                                                                                           |                                                       |                                                               | no CPDs                                                                                                       |                                                                   |                                                                      |
| Acacia catechu extract                                                                        |                                                                              | XX                                                                                                          |                                                                                                                                           |                                                       |                                                               | no CPDs                                                                                                       |                                                                   |                                                                      |
| <b>Key:</b>                                                                                   |                                                                              |                                                                                                             |                                                                                                                                           |                                                       |                                                               |                                                                                                               |                                                                   |                                                                      |
| hit candidate                                                                                 |                                                                              | DMSO ≠ aqueous                                                                                              |                                                                                                                                           |                                                       |                                                               | quenches more dCPDs than<br>it generates                                                                      |                                                                   |                                                                      |
|                                                                                               |                                                                              | X = increases chemilum                                                                                      |                                                                                                                                           | X = increases dCPD                                    |                                                               | X = increases dCPD                                                                                            |                                                                   |                                                                      |
|                                                                                               |                                                                              | Enhances energy transfer<br>& light from triplet-state or<br>cmp forms dioxetane                            |                                                                                                                                           |                                                       |                                                               |                                                                                                               |                                                                   |                                                                      |
|                                                                                               |                                                                              |                                                                                                             |                                                                                                                                           |                                                       |                                                               |                                                                                                               |                                                                   |                                                                      |
|                                                                                               |                                                                              |                                                                                                             |                                                                                                                                           |                                                       |                                                               |                                                                                                               |                                                                   |                                                                      |

**Table S2.** TMD-DBAS quenching activity of algal extracts.

| Natural Products ID | Country of Extraction           | Genus               | Species                | Extract Type | Triplet Quenching Activity |
|---------------------|---------------------------------|---------------------|------------------------|--------------|----------------------------|
| J003678             | Mauritius                       | <i>Acanthophora</i> | <i>muscoides</i>       | Aqueous      | +++                        |
| J004770             | Florida                         | <i>Gracilaria</i>   | <i>vermiculophylla</i> | Aqueous      | ++                         |
| J001263             | Southern New Zealand            | <i>Porphyra</i>     | <i>sp.1</i>            | Organic      | ++                         |
| J002656             |                                 | <i>Acanthophora</i> | <i>muscoides</i>       | Aqueous      | ++                         |
| J003392             | Tanzania (Tanganyika, Zanzibar) | <i>Gracilaria</i>   | <i>sp.</i>             | Aqueous      | ++                         |
| J004034             | Florida                         | <i>Gracilaria</i>   | <i>foliifera</i>       | Aqueous      | ++                         |
| J001348             | Philippine islands              | <i>Gracilaria</i>   | <i>salicornia</i>      | Aqueous      | +                          |
| J001386             | Philippine islands              | <i>Gracilaria</i>   | <i>arcuata</i>         | Aqueous      | +                          |
| J001654             | Philippine islands              | <i>Acanthophora</i> | <i>sp.</i>             | Aqueous      | +                          |
| J001970             | Philippine islands              | <i>Gracilaria</i>   | <i>eucheumoides</i>    | Aqueous      | +                          |
| J002936             | Celebes                         | <i>Gracilaria</i>   | <i>sp.</i>             | Aqueous      | +                          |
| J003134             | Palau islands                   | <i>Gracilaria</i>   | <i>eucheumoides</i>    | Aqueous      | +                          |
| J003160             | Palau islands                   | <i>Gracilaria</i>   | <i>arcuata</i>         | Aqueous      | +                          |
| J003536             | Tonga                           | <i>Gracilaria</i>   | <i>edulis</i>          | Aqueous      | +                          |
| J003650             | Mauritius                       | <i>Gracilaria</i>   | <i>arcuata</i>         | Aqueous      | +                          |
| J003660             | Mauritius                       | <i>Porphyra</i>     | <i>tenera</i>          | Aqueous      | +                          |
| J003688             | Mauritius                       | <i>Gracilaria</i>   | <i>salicornia</i>      | Aqueous      | +                          |
| J003744             | Vanuatu (New Hebrides)          | <i>Gracilaria</i>   | <i>salicornia</i>      | Aqueous      | +                          |
| J003938             | Florida                         | <i>Gracilaria</i>   | <i>tikvahiae</i>       | Aqueous      | +                          |
| J004050             | Florida                         | <i>Gracilaria</i>   | <i>damaecornis</i>     | Aqueous      | +                          |
| J004066             | Malaysia                        | <i>Gracilaria</i>   | <i>blodgettii</i>      | Aqueous      | +                          |
| J004070             | Malaysia                        | <i>Gracilaria</i>   | <i>gigas</i>           | Aqueous      | +                          |
| J004110             | Palau islands                   | <i>Gracilaria</i>   | <i>salicornia</i>      | Aqueous      | +                          |
| J004112             | Palau islands                   | <i>Gracilaria</i>   | <i>edulis</i>          | Aqueous      | +                          |
| J004274             | Malaysia                        | <i>Acanthophora</i> | <i>spicifera</i>       | Aqueous      | +                          |
| J004356             | Florida                         | <i>Gracilaria</i>   | <i>blodgettii</i>      | Aqueous      | +                          |
| J004884             | Florida                         | <i>Gracilaria</i>   | <i>lemaniformis</i>    | Aqueous      | +                          |
| C019162             | Papua-New Guinea                | <i>Acanthophora</i> | <i>spicifera</i>       | Aqueous      | —                          |
| J000784             | Southeastern Australia          | <i>Gracilaria</i>   | <i>secundata cf</i>    | Aqueous      | —                          |
| J001358             | Philippine Islands              | <i>Gracilaria</i>   | <i>crassa</i>          | Aqueous      | —                          |
| J002878             | Mariana Islands (guam)          | <i>Acanthophora</i> | <i>spicifera</i>       | Aqueous      | —                          |
| J003000             | Palau Islands                   | <i>Gracilaria</i>   | <i>cf. edulis</i>      | Aqueous      | —                          |
| J003078             | Philippine Islands              | <i>Gracilaria</i>   | <i>edulis</i>          | Aqueous      | —                          |
| J000312             |                                 | <i>Palmaria</i>     | <i>palmata</i>         | Aqueous      | —                          |
| J000330             |                                 | <i>Palmaria</i>     | <i>mollis</i>          | Aqueous      | —                          |
| J001650             | Philippine Islands              | <i>Gracilaria</i>   | <i>sp.</i>             | Aqueous      | —                          |
| J001676             | Southwestern Australia          | <i>Gracilaria</i>   | <i>secundata</i>       | Aqueous      | —                          |
| J003504             | Philippine Islands              | <i>Acanthophora</i> | <i>muscoides</i>       | Aqueous      | —                          |
| J004372             | Florida                         | <i>Gracilaria</i>   | <i>blodgettii</i>      | Aqueous      | —                          |
| J004694             | Puerto Rico                     | <i>Gracilaria</i>   | <i>cuneata</i>         | Aqueous      | —                          |
| J004704             | Puerto Rico                     | <i>Gracilaria</i>   | <i>mammillaris</i>     | Aqueous      | —                          |
| J004708             | Puerto Rico                     | <i>Acanthophora</i> | <i>spicifera</i>       | Aqueous      | —                          |
| J004716             | Puerto Rico                     | <i>Gracilaria</i>   | <i>cervicornis cf.</i> | Aqueous      | —                          |
| J004728             | Puerto Rico                     | <i>Gracilaria</i>   | <i>verrucosa</i>       | Aqueous      | —                          |
| J004782             | Florida                         | <i>Gracilaria</i>   | <i>cylindrica</i>      | Aqueous      | —                          |
